1 **Modulation of fatty acid elongation generates sexually dimorphic hydrocarbons and female**  
2 **attractiveness in *Blattella germanica* (L.)**

3 Xiao-Jin Pei <sup>a</sup>, Yong-Liang Fan <sup>a,\*</sup>, Yu Bai <sup>b</sup>, Tian-Tian Bai <sup>a</sup>, Coby Schal <sup>c</sup>, Zhan-Feng Zhang <sup>a</sup>, Nan Chen  
4 <sup>b</sup>, Sheng Li <sup>b</sup>, and Tong-Xian Liu <sup>a,\*</sup>

5  
6 <sup>a</sup> State Key Laboratory of Crop Stress Biology for Arid Areas and Key Laboratory of Integrated Pest  
7 Management on Crops in Northwestern Loess Plateau, Ministry of Agriculture, Northwest A&F University,  
8 Yangling, Shaanxi 712100, P. R. China

9 <sup>b</sup> Guangdong Provincial Key Laboratory of Insect Developmental Biology and Applied Technology and  
10 Institute of Insect Science and Technology, School of Life Sciences, South China Normal University,  
11 Guangzhou 510631, China

12 <sup>c</sup> North Carolina State University, Department of Entomology and Plant Pathology and W.M. Keck Center  
13 for Behavioral Biology, Raleigh, North Carolina, USA.

14

15 \* Corresponding authors:

16 Y.-L. Fan ([yfan@nwafu.edu.cn](mailto:yfan@nwafu.edu.cn)) and T.-X. Liu ([txliu@nwafu.edu.cn](mailto:txliu@nwafu.edu.cn)).

17 E-mail addresses:

18 X.-J. Pei: [xiaojinpei@nwafu.edu.cn](mailto:xiaojinpei@nwafu.edu.cn)

19 Y.-L. Fan: [yfan@nwafu.edu.cn](mailto:yfan@nwafu.edu.cn)

20 T.-X. Liu: [txliu@nwafu.edu.cn](mailto:txliu@nwafu.edu.cn)

21 **Abstract**

22 Insect cuticular compounds serve multiple functions. As important intersexual signaling chemicals, they  
23 show variation between the sexes, but little is known about the underlying molecular mechanisms. Here, we  
24 report that sexually dimorphic hydrocarbons (SDHCs) are generated by a fatty acid elongase gene that is  
25 regulated by sex-differentiation genes in the German cockroach, *Blattella germanica*. Sexually mature  
26 females possess more C<sub>29</sub> cuticular hydrocarbons (CHCs), especially the contact sex pheromone precursor  
27 3,11-DimeC<sub>29</sub>. An RNAi screen and heterologous expression revealed that *BgElo12* and *BgElo24* were  
28 involved in HC production, but only *BgElo12* was responsible for SDHCs. Repressing female-enriched  
29 *BgElo12* masculinized the female CHC profile, decreased contact sex pheromone level, and reduced the  
30 female's sexual attractiveness. Moreover, RNAi of the sex-differentiation genes *BgTra* or *BgDsx* modulated  
31 both *BgElo12* transcripts and CHC profiles in females and males. The SDHCs are shaped by sexual selection,  
32 as females use them to keep high levels of sex pheromone.

33

## 34 **Introduction**

35 Sexual dimorphism is prevalent in the animal kingdom. Females and males independently evolve  
36 some traits that enhance survival and reproduction under the pressure of divergent selection forces, thus  
37 leading to sexual dimorphism of traits such as body size (Bear and Monteiro, 2013). Under sexual  
38 selection, asymmetric selection on the sexes can also result in the evolution of sexually dimorphic traits;  
39 however, these traits are subject to both inter- and intra-sexual selection (Darwin, 1871; Andersson, 1994).  
40 Because males and females of the same species share the majority of their genomes, the genetic basis of  
41 sex-specific traits that evolve under sexual selection is poorly understood. It is widely assumed that  
42 sexually dimorphic regulation of gene expression facilitates sex-specific adaptations (Connallon and  
43 Knowles, 2005; Innocenti and Morrow, 2010; Mank, 2017; Rogers et al., 2020). Recruitment of pre-  
44 existing genes or pathways into sexually dimorphic regulatory contexts has been proposed as a remarkable  
45 mechanism enabling the divergence of gene expression between the sexes (Kopp et al., 2012; Williams et  
46 al., 2008; Tanaka et al., 2011). The sex-differentiation pathway is a conserved switch or regulator  
47 governing a set of downstream genes that direct sexually dimorphic traits (Clough et al., 2014; Prakash and  
48 Monteiro, 2016). The signaling cascades that transform original gender differences (sex-specific  
49 chromosomes) into the alternative splicing of sex differentiation genes (e.g. *Transformer* and *Doublesex* in  
50 insects), and the patterns of these genes being spliced into sex-based isoforms have been widely described  
51 in different insect orders (Hasselmann et al., 2008; Zhang et al., 2014a; Kiuchi et al., 2014; Herpin and  
52 Schartl, 2015; Hall et al., 2015). However, sexually dimorphic traits are usually generated from tightly  
53 associated multiple biosynthetic steps that are executed by a series of genes, and the nodes at which sex-  
54 determining signals connect with the biosynthetic pathway are poorly understood. Moreover, how these  
55 genes are translated into sexually dimorphic traits under elaborate spatial and temporal patterns also needs  
56 to be elucidated.

57 The main function of insect cuticular hydrocarbons (CHCs) is to waterproof the cuticle to resist  
58 dehydration under dry conditions (Gibbs, 1998). In many insects, CHCs have been coopted to serve as  
59 chemical signals (pheromones) that mediate intraspecific communication (Blomquist and Ginzl, 2021;  
60 Howard and Blomquist, 2005). Sexually dimorphic CHC (SDCHC) profiles are widespread in insects  
61 (Ingleby et al., 2014; Zhang et al., 2014b; Berson et al., 2019), but the regulatory networks that underlie the  
62 formation of SDCHCs largely remain unknown in insects. Considerable works have been done toward the

63 genetic basis of HC biosynthesis and CHC variation in insects. An acetyl-CoA carboxylase catalyzes the  
64 biosynthesis of malonyl-CoA, and a cytosolic fatty acid synthase (FAS) incorporates malonyl-CoA units  
65 onto the acetyl-CoA primer to form linear long-chain fatty acids (LCFAs). A microsomal FAS catalyzes  
66 the biosynthesis of methyl-branched LCFAs using methyl malonyl-CoAs (Juárez et al., 1996; 1992;  
67 Blomquist et al., 1995; Parvy et al., 2012; Chung et al. 2014; Wicker-Thomas et al. 2015; Ginzel and  
68 Blomquist, 2016). The LCF acyl-CoA can be selectively desaturated by a specific fatty acid desaturase  
69 (Desat), leading to unsaturated fatty acids (Chertemps et al., 2006; Legendre et al., 2008). The LCF acyl-  
70 CoAs are elongated to form very-long-chain fatty acids (VLCFAs) with specific chain lengths by a fatty  
71 acid elongation system, including a rate-limiting elongase (ELO) and three other enzymes (Chertemps et  
72 al., 2007; Wicker-Thomas et al., 2015). The VLCF acyl-CoAs are finally reduced to long-chain alcohols by  
73 fatty acyl-CoA reductases (FARs) and converted to HCs by the P450 oxidative decarbonylase CYP4Gs  
74 (Qiu et al., 2012; MacLean et al., 2018; Li et al., 2019a). It is now clear that the variation in CHCs is  
75 primarily reflected in the chain length, number and positions of methyl groups, and the degree of  
76 unsaturation, which are determined by ELOs, FASs, and Desats, respectively (Blomquist and Bagnères,  
77 2010; Chung and Carroll, 2015; Holze et al., 2020). These genes have been studied in few insect species  
78 with regard to SDHCs.

79 In the fruit fly *Drosophila melanogaster*, several studies have elucidated the pheromonal sexual  
80 dimorphism of CHCs. Female flies produce C27 and C29 dienes (7,11-heptacosadiene and 7,11-  
81 nonacosadiene), and both of them function as female-specific contact sex pheromone components, whereas  
82 male flies produce C23 and C25 monoenes (7-tricosene and 7-pentacosene) (Ferveur and Sureau, 1996).  
83 Ferveur et al. (1997) found that the targeted expression of a sex-differentiation gene, *Transformer*, in male  
84 oenocytes feminized the male CHC profile, and elicited homosexual courtship from other males. These  
85 findings implicated sex-differentiation genes in the production of SDHCs. About 10 years later, Chertemps  
86 et al. (2006) revealed that the female-specific *desatF* was responsible for the generation of pheromonal  
87 dienes in female *D. melanogaster*, and they also found that the sexual dimorphism in HC chain length was  
88 modulated by the female-specific *eloF* (Chertemps et al., 2007). The specific expression of *desatF* in *D.*  
89 *melanogaster* females was due to a special *cis*-regulatory element (CRE) located upstream of *desatF* in *D.*  
90 *melanogaster*; the CRE presented a doublesex protein (Dsx) binding site that could be recognized by the  
91 female-specific isoform of *Dsx* (*Dsx-F*), and the binding of Dsx-F activated the transcription of *desatF*,

92 whereas male-specific Dsx showed no regulatory activity, resulting in sexual dimorphism of *desatF*  
93 expression (Shirangi et al., 2009). However, the regulation of other genes involved in the production of  
94 SDHCs remains unknown in *D. melanogaster*, and studies in other insects are even rarer.

95 The German cockroach, *Blattella germanica* is a notorious worldwide indoor pest (Schal, 2011).  
96 Considerable works have been done on biochemical aspects of CHCs in *B. germanica* (Chase et al., 1990;  
97 Juárez et al., 1992; Schal et al., 1994; Juárez, 2004). CHCs in *B. germanica* function as waterproofing  
98 agents (Young et al., 2000), and as importantly, specific HC components are also the biosynthetic  
99 precursors for the production of contact sex pheromone components. 3,11-DimeC29 is the most abundant  
100 CHC in females. Its hydroxylation at the 2 position, catalyzed by an age- and sex-specific putative  
101 cytochrome P450 and further oxidation of the -OH generates the main female-specific contact sex  
102 pheromone component, 3,11-DimeC29-2-one (Chase et al., 1992). The contact sex pheromone is an  
103 efficient courtship signal. When a sexually mature male's antennae detect the sex pheromone on the female  
104 body surface (mainly the antennae), a "fencing" of male and female antennae ensues. The male then rotates  
105 his body and orients the abdominal tip toward the female's head, while raising his wings to expose a  
106 specialized tergal gland. A mixture of nutrients in the tergal secretion functions as phagostimulants, placing  
107 the female in an appropriate position for copulation while she is engaged in feeding on the secretion  
108 (Nojima et al., 1999; Eliyahu et al., 2008a; 2009). More recently, Wexler et al. (2019) decoded the  
109 alternative splicing patterns of sex-differentiation genes in *B. germanica*. BgTra is only functional in  
110 females and can splice *BgDsx* into two non-functional female-specific isoforms (*BgDsx<sup>F</sup>*), whereas males  
111 generate a complete functional male-type *BgDsx* (*BgDsx<sup>M</sup>*). These findings provide opportunities for  
112 exploring the mechanisms underlying the SDHCs in *B. germanica*.

113 In this study, we employed *B. germanica* as a model insect. We characterize the SDCHCs, describe  
114 their temporal development, and identify and provide evidence that *BgElo12* is responsible for the  
115 formation of SDCHC profiles. In addition, we found that the female-enriched HCs are important in the  
116 generation of the female-specific contact sex pheromone; RNAi of *BgElo12* in females decreased courtship  
117 responses of males. Moreover, we show that *BgElo12* is under the regulation of the sex-differentiation  
118 pathway; *BgDsx<sup>M</sup>* can specifically repress the transcription of *BgElo12*. These findings suggest that the  
119 generation of SDHCs is achieved by putting a fatty acid elongation gene (*BgElo12*) under the regulation of

120 *BgDsx<sup>M</sup>*, and linking the sex-differentiation regulatory cascade with the HC biosynthesis pathway, resulting  
121 in the asymmetric gene expression and sexually dimorphic HCs in *B. germanica*.

122

## 123 **Results**

### 124 **The sexual dimorphism of cuticular hydrocarbons in *B. germanica***

125 The temporal development of SDCHCs is rarely reported. In order to understand the molecular  
126 mechanisms of SDHC generation, we first analyzed the CHC profiles during sexual maturation. The oocytes  
127 of female cockroaches mature after eclosion by taking up vitellogenin until ovulation (Schal et al., 1994),  
128 and females become sexually receptive and mate 4-5 days before ovulation (Schal and Chiang, 1995). In our  
129 study, female cockroaches oviposited late on day 7 or early day 8 (data not shown), therefore AD1–6 (adult  
130 days 1-6) adult cockroaches were used for CHC analysis. Different CHC components were identified as  
131 previously described (Jurenka et al., 1989). We found no qualitative differences between males and females,  
132 but quantitative differences in CHCs became more apparent with adult age (Source data 1). At the early adult  
133 stage (AD1 and AD2), females and males showed a similar CHC profile. However, differences were apparent  
134 at AD3 and gradually increased until AD6 (Figure 1A). Along with sexual maturation in males, the  
135 proportions of C29 CHCs and especially 3,7-; 3,9-; 3,11-DimeC29 (female-enriched peak 24) significantly  
136 decreased, while C27 CHCs and 9-; 11-; 13-; 15-MeC29 (male-enriched peak 17) increased. In females,  
137 however, the CHC profiles consistently displayed high proportions of C29 CHCs and especially 3,7-; 3,9-;  
138 3,11-DimeC29 (Figure 1B–E). Principal component analysis (PCA) showed that the male and female CHC  
139 profiles were more similar at AD1, but diverged at AD6, and the divergence was mainly reflected in the  
140 principal component 2 which largely represents the chain length factor (Figure 1F–G). The sexual  
141 dimorphism of CHCs was generated at the adult stage (nymphal CHC chromatogram showed no qualitative  
142 differences between males and females, Figure 1–figure supplement 1), and the sexes diverged with sexual  
143 maturation. Notably, the differences between male and female CHC profiles suggested that chain length is  
144 an important factor in sexual dimorphism of CHCs.

145

### 146 ***BgElo12* and *BgElo24* are involved in HC biosynthesis**

147 The genetic basis of HC production in *B. germanica* is not completely understood. Our previous work  
148 identified a fatty acid synthase gene (*BgFas1*) and a P450 oxidative decarboxylase gene (*CYP4G19*) that are  
149 involved in HC biosynthesis, but both showed no function in maintaining the sexual dimorphism of CHCs  
150 (Pei et al., 2019; Chen et al., 2020). In this study, we found that the differences of CHCs between females

151 and males are largely reflected in carbon chain length, which suggests that elongase genes may be the crucial  
152 regulator of SDCHCs. This was consistent with specific C29 CHCs reported to be enriched in females, and  
153 C27 CHCs enriched in males (Wexler et al., 2019). Based on this assumption, we searched for potential  
154 *BgElo* genes in the *B. germanica* genomic data and our full length transcriptomic data (Harrison et al., 2018;  
155 Pei et al., 2019). A total of 24 different *BgElo* candidate genes were identified, and all *BgElos* were cloned  
156 and re-sequenced. Sequence alignment revealed that different BgElo proteins showed high homology and  
157 contained the conserved HXXHH and YXYY motifs (Moon et al., 2001). All BgElo proteins displayed a  
158 ELO domain and several transmembrane domains (Supplementary file 1).

159 The fatty acid precursors used for HC production generally originate in the oenocytes, but also can be  
160 transported from the fat body to oenocytes (Wicker-Thomas et al., 2015). Therefore, we first analyzed the  
161 transcript levels of all *BgElos* in the fat body and abdominal integument. Results showed that *BgElo24* and  
162 *BgElo12* were highly expressed in the integument, and *BgElo1, 2, 3, 6, 7, 9, 10, 11, 14, 17, 20,* and *22* were  
163 also abundant in the integument, while other *BgElos* were nearly undetectable (Figure 2A). In the fat body,  
164 *BgElo10* and *BgElo22* were highly expressed, *BgElo1, 2, 3, 11, 12,* and *24* were slightly expressed, and other  
165 *BgElos* were undetectable (Figure 2B).

166 Based on these results, RNAi of the genes that were expressed in the abdominal integument or fat body  
167 was performed. A first injection of dsRNA was performed in early fifth-instar nymphs (N5D1 or N5D2), and  
168 a boost injection was performed one week later, and then the treated cockroaches were collected at different  
169 adult stages and subjected to CHC analysis. RNAi of different *BgElo* genes significantly decreased the  
170 mRNA level (Figure 2–figure supplement 1). GC–MS analysis of CHCs showed that C27 CHCs were  
171 affected by many genes – knockdown of *BgElo1, 10, 12, 14, 20,* and *24* caused a significant increase in C27  
172 CHCs, and repression of *BgElo12* showed the greatest increase of the content of C27 CHCs (Figure 2C). C28  
173 CHCs were rarely affected, with only knockdown of *BgElo24* causing a significant decrease in C28 CHCs  
174 (Figure 2D). C29 CHCs were the most abundant in *B. germanica*, and only RNAi of *BgElo12* or *BgElo24*  
175 significantly decreased their amount (Figure 2E). RNAi of *BgElo12* or *BgElo24* dramatically decreased the  
176 amount of C30 CHCs, while RNAi of *BgElo2* increased C30 CHCs (Figure 2F). CHCs with chain lengths  
177 greater than 30 occur in low quantities in *B. germanica*, but the most striking result was a sharp decline that  
178 resulted from *BgElo24*-RNAi (Figure 2–figure supplement 2). The detailed changes of individual CHCs after  
179 RNAi of *BgElos* are available in Source data 2. In conclusion, these data strongly suggest that *BgElo12* and



180 *BgElo24* are involved in CHC production, but we cannot rule out that other *BgElo* genes might have a less  
181 prominent role in HC biosynthesis.

182

### 183 ***BgElo12* is the terminal gene in maintaining sexually dimorphic hydrocarbon profiles**

184 Although, it appears that both *BgElo12* and *BgElo24* are involved in HC production, it is unclear which  
185 gene is responsible for sexual dimorphism of CHCs. Therefore, we compared the CHC profiles of treated  
186 female cockroaches with wild type male cockroaches. The results showed that only RNAi of *BgElo12* made  
187 the female CHC profile more similar to the male profile (Figure 3A), reflected by a significant increase of  
188 C27 CHCs without affecting the male-enriched peak 17, and a selective downregulation of C29 CHCs, with  
189 a dramatic downregulation of the female-enriched peak 24 and some other C29 CHCs (Figure 3B). Also,  
190 knockdown of *BgElo12* increased the proportions of C27 CHCs and peak 17, while the proportions of C29  
191 CHCs and peak 24 significantly decreased (Figure 3D). These changes exactly converged the female CHC  
192 profile toward the male CHC profile. The repression of *BgElo24* downregulated all C28–C32 CHCs (Figure  
193 3C), even though knockdown of *BgElo24* increased the proportion of C27 CHCs, and decreased the  
194 proportion of C29 CHCs and peak 24 (Figure 3E); the amount of the male-enriched peak 17 was also  
195 dramatically downregulated (Figure 3C). Similar results were generated in males, and RNAi of *BgElo12*  
196 generated the characteristics of male CHC profiles, while *BgElo24*-RNAi downregulated all C28–C32 CHCs  
197 (Figure 3–figure supplement1). In order to confirm these results, a second RNAi target was used for both  
198 genes, and similar results were generated (Figure 3–figure supplement 2A–B). In addition, we analyzed the  
199 internal HCs after repression of *BgElo12* or *BgElo24*. The internal HCs underwent similar changes as CHCs  
200 (Figure 3–figure supplement 2C–D). These results suggest that the changes imposed by *BgElo12*- or  
201 *BgElo24*-RNAi were caused by a deficiency in *de novo* HC biosynthesis and not the transport of HCs from  
202 internal tissues to the cuticle.

203 We also examined the spatio-temporal expression of *BgElo12* and *BgElo24*. Both *BgElo12* and *BgElo*  
204 *24* were primarily expressed in the abdominal integument, where the oenocytes that produce HCs are located  
205 (Figure 3–figure supplement 3). Monitoring of *BgElo12* expression in females and males across different  
206 developmental stages showed that female and male *BgElo12* mRNA levels were similar at N6D4 and early  
207 adult stage, but its expression level was higher in females than in males at AD3, and the difference increased  
208 through AD6 (Figure 3F), a pattern similar to the production of SDCHCs. The expression levels of *BgElo24*

209 were higher in males than in females starting at AD2 (Figure 3G). These results also support that only  
210 *BgElo12*, and not *BgElo24*, is involved in sexual dimorphism of CHCs in *B. germanica*.

211 Finally, because CHCs are important waterproofing agents in insects (Gibbs, 1998), we investigated the  
212 roles of *BgElo12* and *BgElo24* in desiccation resistance. We found that repression of *BgElo24* dramatically  
213 decreased tolerance of desiccation, but RNAi of *BgElo12* had little effect on desiccation tolerance (Figure  
214 3H). These results indicate that the biological significance of *BgElo12* in cockroaches is to support sexual  
215 dimorphism of CHCs, whereas *BgElo24* supports desiccation tolerance.

216

### 217 **BgElo24 provides VLCFA substrates for BgElo12**

218 Thus far, we showed that both *BgElo12* and *BgElo24* are involved in HC production, RNAi of *BgElo12*  
219 only selectively decreased some HCs while repression of *BgElo24* dramatically downregulated all C28–C29  
220 HCs, and some HCs were affected by both *BgElo12* and *BgElo24*. We also found that knockdown of *BgElo24*  
221 caused a two-fold upregulation of *BgElo12*, while RNAi of *BgElo12* had no significant influence on *BgElo24*  
222 mRNA level (Figure 4–figure supplement 1A–B). Therefore, we considered whether BgElo24 is a basic  
223 elongase that provides substrates used for HC biosynthesis, and if BgElo24 generates primary precursors that  
224 can be further catalyzed by BgElo12. We verified the functions of BgElo12 and BgElo24 in VLCFA  
225 biosynthesis with heterologous expression of *BgElo12* and *BgElo24* in *Saccharomyces cerevisiae* (strain  
226 INVSc1). The genetic background of *S. cerevisiae* is relatively clear, as wild type *S. cerevisiae* contains three  
227 different ELO proteins: ELO1 is able to elongate C14 FAs to C16 FAs, ELO2 can generate C24 FAs, and  
228 ELO3 plays essential roles in the conversion of C24 FAs to C26 FAs (Toke and Martin, 1996; Oh et al.,  
229 1997). In our study, activation of GAL1 promoter by galactose successfully transcribed the target genes, and  
230 we detected the expression GFP protein (Figure 4–figure supplement 1C–E). GC–MS analysis of FAs in *S.*  
231 *cerevisiae* that contained pYES2-GFP (control) detected large amounts of C16:1, C16:0, C18:1, and C18:0  
232 FAs, minor amounts of C20–C24 and C28 FAs, and a larger amount of C26:0 FAs (Source data 3). Yeast  
233 with exogenous *BgElo12* did not produce any new FAs, but heterologous expression of *BgElo24* sharply  
234 increased the amount of C28:0 FA, and generated a new component, C30:0 FA (Figure 4A–C; Figure 4–  
235 figure supplement 1H–I). These results suggest that BgElo24 is capable of elongating endogenous yeast FAs  
236 to generate C28:0 and C30:0 FAs.

237 Considering that BgElo12 and BgElo24 may selectively elongate substrates with specific carbon chain

238 lengths, we separately added C20:0, C22:0, C24:0, C26:0, and C28:0 FAs to the medium. Compared with  
239 the control, BgElo24 did not produce any new FAs when C20:0, C22:0, C24:0, or C26:0 were added (Source  
240 data 3). However, when C28:0 FA was added, yeast with pYES2-BgElo12 generated C30:0 FA, although in  
241 small amounts (Figure 4A'-C'; Source data 3). These results suggest that BgElo24 not only directly provides  
242 substrates (C28 and C30 fatty acyl-CoAs) for the biosynthesis of C27 and C29 *n*-alkanes, but also provides  
243 C28 fatty acyl-CoA for BgElo12 to elongate to C30 fatty acyl-CoA, which in turn generates C29 *n*-alkane.  
244 This might be the reason why *in vivo* RNAi of *BgElo12* slightly decreased C29 *n*-alkane and caused a  
245 dramatic increase in C27 *n*-alkane, whereas RNAi of *BgElo24* dramatically decreased C29 *n*-alkane. In order  
246 to analyze the activity of BgElo12 and BgElo24 in elongating methyl-branched FAs, two representative  
247 substrates, 2-MeC16:0 and 14-MeC16:0 FAs, the potential substrates for 15-methyl HCs and 3-methyl HCs,  
248 respectively, were added to the medium. However, we found that these substrates could not be catalyzed by  
249 BgElo12 or BgElo24 (Figure 4-figure supplement 1F-F'' and 1G-G''). We suspect that this might be caused  
250 by a shortcoming of the yeast FA elongation system. FA elongation requires an elongase and three other  
251 enzymes including a 3-keto-acyl-CoA-reductase, a 3-hydroxy-acyl-CoA dehydratase, and a trans-enoyl-  
252 CoA-reductase (Wicker-Thomas et al., 2015). The last three yeast endogenous enzymes may not catalyze  
253 methyl branched substrates. In conclusion, these results indicate that both BgElo12 and BgElo24 catalyzed  
254 the biosynthesis of VLCFAs in the yeast heterologous system, and BgElo24 was able to provide primary  
255 substrates for BgElo12. However, the activity of BgElo12 and BgElo24 in methyl-branched FA elongation  
256 needs further investigation.

257

## 258 **Female-enriched HCs are crucial for contact sex pheromone-based courtship** 259 **performance**

260 The largest single chromatographic HC peak in females contains 3,7-; 3,9-; 3,11-DimeC29, which is  
261 much less represented in males. Because 3,7-; 3,9-; 3,11-DimeC29 has been shown to be the precursor for  
262 the contact sex pheromone 3,11-DimeC29-2-one (C29 methyl ketone) in *B. germanica* (Chase et al., 1992),  
263 we suspected that the female-specific HC profile may be important for maintaining a high level of contact  
264 sex pheromone. We first monitored the pattern of 3,11-DimeC29-2-one accumulation in the first gonotrophic  
265 cycle. The contact sex pheromone showed a stable low level at the early adult stage (AD0-AD2), its  
266 accumulation started at AD3, quickly increased from AD5 to AD7 (Figure 5A), but decreased at AD8 when

267 most females oviposited (data not shown). Analysis of the influence of *BgElo12*-RNAi on C29 methyl ketone  
268 was performed at AD6. Female cockroaches were subjected for three consecutive dsRNA injections before  
269 being subjected to lipid analysis: the first one at early fifth instar, the second one at early sixth instar, and the  
270 third one at AD1. We found that repression of *BgElo12* reduced the C29 methyl ketone by more than 75% in  
271 both cuticular and internal extractions (Figure 5B–D).

272 We next determined whether the *BgElo12*-RNAi repression of pheromone production in females  
273 affected male courtship behavior. When the female contact sex pheromone is detected by a male, it displays  
274 a characteristic male courtship behavior, including wing-raising (WR) (Eliyahu et al., 2008a). Importantly,  
275 this behavior can be elicited by an isolated female antenna, and details of this assay, including latency and  
276 rate of WR, have been described (Wada-Katsumata and Schal, 2019). When an antenna of AD5 female was  
277 used as stimulus, nearly all males responded. RNAi of *BgElo12* resulted in only a slight decline in WR rate  
278 (about 20%), but the latency of WR was significantly increased (Figure 5E and 5E'). AD5 females  
279 accumulated a large amount of contact sex pheromone, whereas males can be fully activated by about 10 ng  
280 of 3,11-DimeC29-2-one applied onto an antenna (Schal et al., 1990). This is likely the reason why RNAi of  
281 *BgElo12* had only a small influence on WR rate. Therefore, we repeated this experiment using AD3 females,  
282 which have less contact sex pheromone on the cuticle. We found that males responded to 80% of the control  
283 antennae with the WR display, but less than 40% of the antennae from *BgElo12*-RNAi females elicited WR  
284 in males. The average latency of WR toward antennae of *BgElo12*-RNAi females was 18.03 s, while the  
285 control antennae elicited WR in 11.05 s (Figure 5F and 5F'). These results indicate that the female-enriched  
286 HCs are advantageous for contact sex pheromone biosynthesis, especially at the early sexual maturation stage.  
287

## 288 **Sex-differentiation genes modulate *BgElo12***

289 The female-enriched HC composition is tightly associated with a higher expression of *BgElo12* in  
290 females, but the regulators that govern sexually dimorphic expression of *BgElo12* in females and males are  
291 unknown. Wexler et al. (2019) reported that RNAi of the sex-determination gene *BgTra* in females converts  
292 its CHC profile to a male-like profile. Taken together with our results, it would appear that the sex-  
293 differentiation pathway might be involved in regulating *BgElo12* expression. We first confirmed the function  
294 of *BgTra* and *BgDsx* in sex-specific development *via* RNAi. For each gene, we used two unique RNAi targets  
295 within a conserved sequence region for multiple isoforms. RNAi of *BgTra* and *BgDsx* in females or males

296 showed similar phenotypes as described by Wexler et al. (2019). *BgTra* is only functional in females, while  
297 *BgDsx* only works in males (Figure 6–figure supplement 1). We next studied the expression of *BgTra* and  
298 *BgDsx* in females and males using qPCR primers that target all isoforms of each gene. The expression of  
299 both *BgTra* and *BgDsx* increased after eclosion, but *BgTra* transcript levels tended to be stable from AD4 to  
300 AD6 (Figure 6A–B). RNAi of *BgTra* in females significantly decreased the mRNA level of *BgElo12*, but  
301 *BgElo12* expression was unaffected in males (Figure 6C). Notably, the downregulation of *BgElo12* by  
302 ds*BgTra*-injection in females could be rescued by co-injection of ds*BgTra* and ds*BgDsx* (Figure 6C), but  
303 ds*BgDsx* alone was not functional in regulating *BgElo12* expression in females (Figure 6D). Conversely, in  
304 males, knockdown of *BgDsx* alone increased the expression of *BgElo12* (Figure 6D). According to Wexler  
305 et al. (2019), RNAi of *BgTra* in females generated the male type *BgDsx* (*BgDsx<sup>M</sup>*). We suspect that the  
306 downregulation of *BgElo12* in females after RNAi of *BgTra* was caused by the generation of *BgDsx<sup>M</sup>*. This  
307 hypothesis was supported by co-injection of ds*BgTra* and ds*BgDsx*, and a dual-luciferase reporter assay that  
308 *BgDsx<sup>M</sup>* could directly modulate the expression of *BgElo12* by interaction with its upstream sequence region  
309 (Figure 6-figure supplement 2). Further, we found that RNAi of neither *BgTra* in females nor *BgDsx* in males  
310 could affect the expression of *BgElo24* (Figure 6–figure supplement 3), suggesting that *BgElo24* is not  
311 regulated by these two sex-differentiation genes.

312 We further analyzed the effects of *BgTra* and *BgDsx* on HC profiles. Knockdown of *BgTra* in females  
313 masculinized the CHC profile and increased the male-enriched CHC components; however, this change  
314 disappeared by co-injection of ds*BgTra* and ds*BgDsx* (Figure 6E–F, and Figure 6–figure supplement 4A).  
315 Similarly, repression of *BgDsx* in males feminized the CHC profile, and increased the female-enriched  
316 components (Figure 6E, 6G, and Figure 6–figure supplement 4B). In order to verify that the sex-  
317 differentiation genes affected CHC profiles by regulating the generation of HCs but not their selective  
318 transport and deposition to the cuticle, we analyzed the internal HCs. RNAi of both *BgTra* in females and  
319 *BgDsx* in males caused an inter-sexual conversion of internal HC profiles, as seen in the CHCs (Figure 6–  
320 figure supplement 5A–D). Although we found little qualitative differences in the HC profiles between  
321 internal and cuticular HCs, we found significant quantitative changes. For example, after RNAi inhibition of  
322 *BgTra* in females, the increase of 9-; 11-; 13-; 15-MeC29 (peak 17) on the epicuticle was greater than internal  
323 tissues, while the decrease of 3,7-; 3,9-; 3,11-DimeC29 (peak 24) in surface was less than internal tissues  
324 (Figure 6–figure supplement 4A and Figure 6–figure supplement 5A). Suggesting the possibility of excessive

325 transport of internal HCs toward the cuticle after repression of *BgTra* in females. As for RNAi of *BgDsx* in  
326 males, an opposite change was generated – there appeared to be less transport of HCs to the cuticle (Figure  
327 6–figure supplement 4B, Figure 6–figure supplement 5B). Also, the total amount of internal HCs was  
328 significantly decreased in *BgTra*-RNAi females, while it was increased in *BgDsx*-RNAi males (Figure 6–  
329 figure supplement 5E and 5F). These results suggest there is an unusual transport of HCs after repression of  
330 *BgTra* or *BgDsx*. We suspect that the unusual transport of HCs may be caused by changes in the capacity to  
331 store internal HCs, as large amounts of internal HCs are shunted to the ovaries (Schal et al., 1994; Gu et al.,  
332 1995), and sex-differentiation genes are the key regulators of normal ovary development in females and  
333 repression of ovary generation in males (Kopp, 2012; Wexler et al., 2019). We conclude that although the  
334 transport of HCs from internal tissues to the cuticle was affected after repressing *BgDsx* or *BgTra*, the effect  
335 was on overall HC transport, with no apparent selective transport on specific HCs.

336 Overall, our results indicate that the sexual dimorphism of HCs in *B. germanica* is primarily determined  
337 by *BgElo12*, and sex-determination pathway genes are the critical regulators that control the asymmetric  
338 expression of *BgElo12* between males and females.

339

## 340 **Discussion**

341 Our study reveals a novel molecular mechanism responsible for the formation of SDHCs in *B.*  
342 *germanica*. The CHC profiles in insects are regulated by complex biosynthetic and transport pathways,  
343 involving multiple gene families. We demonstrated that a fatty acid elongation step is responsible for sexual  
344 dimorphism of CHCs in *B. germanica*, the female-enriched *BgElo12* is the core gene that encodes for the  
345 elongase involved in generating more female-enriched HCs, and the asymmetric expression of *BgElo12*  
346 between the sexes is modulated by sex-differentiation genes: *BgDsx<sup>M</sup>* represses the expression of *BgElo12* in  
347 males, while *BgTra* removes this repression in females. Because a female-enriched HC serves as a precursor  
348 to a female contact sex pheromone, we also revealed the prominence of *BgElo12* in sexual behavior.

349

### 350 **Fatty acid chain elongation is a key step in the regulation of sexually dimorphic HCs in *B.*** 351 ***germanica***

352 The diversity of HCs in insects is reflected in the HC carbon chain lengths, their degree of saturation,  
353 and the number and positions of methyl groups (Holze et al., 2020). HCs in *B. germanica* are composed of  
354 only alkanes and methyl-branched alkanes, and the fatty acid biosynthesis gene that governs the incorporation  
355 of methyl groups in the aliphatic chain showed no role in generating the sexual dimorphism of HCs in *B.*  
356 *germanica* (Pei et al., 2019). In this study, we found that sexually mature female cockroaches contain  
357 relatively higher amounts of C29 HCs than males, whereas male cockroaches had more C27 HCs, suggesting  
358 that chain length is an important factor in the dimorphism of HCs.

359 Studies of the genetic bases of HC biosynthesis in insects have demonstrated that chain lengths are  
360 determined by the fatty acid elongation process: the rate-limiting enzyme elongase determines the chain  
361 lengths of VLCFA products, and produces the final HCs with different chain lengths (Ginzel and Blomquist,  
362 2016). In our study, an RNAi screen identified that *BgElo12* and *BgElo24* were involved in HC biosynthesis.  
363 Expression of both genes in yeast demonstrated that both *BgElo12* and *BgElo24* displayed functions similar  
364 to ELOVL4 in mammals, which showed a special function in the biosynthesis of VLCFAs with chain lengths  
365 greater than C28 (Ohno et al., 2010). *BgElo24*, however, is a more fundamental elongase that seems able to  
366 catalyze a wide range of substrates to generate FAs of various chain lengths, and can also provide primary  
367 substrates for *BgElo12* to produce C30 FAs. Notably, only *BgElo12* had higher expression in females, which

368 was consistent with the higher amounts of C29 HCs in females. Knockdown of *BgElo12* in females caused  
369 a dramatic decrease of the female-enriched peak 24 (3,11-DimeC29) but it did not affect the male-enriched  
370 peak 17 (9-; 11-; 13-; 15-MeC29), which generated a male-like HC profile; however, RNAi of *BgElo24*  
371 unselectively downregulated all C28–30 HCs, indicating that only *BgElo12* was involved in the formation of  
372 SDHCs in *B. germanica*. Lastly, we found both RNAi of *BgElo12* and *BgElo24* increased some C27 HCs,  
373 indicating that there are some other *BgElos* involved in HC production. The identification of these genes will  
374 be arduous, because the C27 compounds occur in small amounts, and multiple BgElos may catalyze the  
375 synthesis of the same HC independently. It is worth noting in this regard that *Blattella asahinai*, a sister  
376 species of *B. germanica* produces almost no C27 compounds (Pfannenstiel et al. 2008). These two species  
377 can hybridize, potentially offering a resource for the genetic regulation of C27 HCs.

378 In *B. germanica*, as in other insects, HCs are transported through the haemolymph and selectively  
379 incorporated into or deposited on various tissues, including the cuticle, ovaries and specialized pheromone  
380 glands (Young et al., 2000; Schal et al., 2001; Schal et al. 1998). In our study, analysis of the influence of  
381 *BgElo12*-RNAi on internal HCs demonstrated that the female- and male-specific CHC profiles were not  
382 caused by selective transport, but rather by differences in *de novo* HC biosynthesis between the sexes,  
383 regulated by *BgElo12*. Elongases have been shown to participate in HC production in several other insect  
384 species including *D. melanogaster*, *Nilaparvata lugens*, and *Locusta migratoria* (Chertemps et al., 2007; Li  
385 et al, 2019b; Zhao et al., 2020). The elongase gene *eloF* was also shown to be specifically expressed in  
386 females, and might be associated with the sex-differentiation gene *Transformer*, but the reason why it cannot  
387 be transcribed in male flies is not very clear (Chertemps et al., 2007). Nevertheless, the roles of elongase  
388 genes in sexual dimorphism of HCs in other insects have not been described.

389

### 390 ***BgElo12* and *BgDsx<sup>M</sup>* are key nodes connecting the hydrocarbon synthesis and sex-** 391 **differentiation pathways**

392 In this study, we first demonstrated that *BgElo12* is the key regulator in the HC biosynthesis pathway,  
393 responsible for the differences in the HC profiles between females and males. We next explored the upstream  
394 regulators that modulate the sexually dimorphic expression of *BgElo12*. The molecular genetic switches that  
395 determine which sex-determination pathway is followed by males and females are highly variable in animals.  
396 The *doublesex/mab-3 related (Dmrt)* family of transcription factors includes conserved developmental



397 regulators in the sex-differentiation pathway, governing the fate of sexually dimorphic traits in animals (Kopp,  
398 2012). *Doublesx* (*Dsx*) in arthropods, which is related to *Dmrt*, works through sex-specific splice variants  
399 that are controlled by *Tra* in many insects. Sex-specific *Dsx* isoforms promote sexual differentiation by  
400 modulating diverse downstream genes; thus, the *Dsx* gene is regarded as a central nexus in sexual  
401 differentiation (Gempe and Beye, 2011; Verhulst and van de Zande, 2015). Previous work reported that  
402 knockdown of *BgTra* converted the female cockroach CHC profiles to male-like profiles (Wexler et al., 2019).  
403 In our study, RNAi of *BgTra* in female cockroaches indeed downregulated the expression of *BgElo12*, but  
404 the effect of *BgTra*-RNAi on *BgElo12* expression could be recovered by co-injection of ds*BgTra* and  
405 ds*BgDsx*, and RNAi of *BgDsx* in males upregulated *BgElo12* transcripts. These results suggest that *BgDsx<sup>M</sup>*  
406 can repress the transcription of *BgElo12* in males, and the downregulation of *BgElo12* by repressing *BgTra*  
407 was caused by the conversion of *BgDsx<sup>F</sup>* to *BgDsx<sup>M</sup>*, as *BgTra* is able to regulate the splicing of *BgDsx<sup>M</sup>* to  
408 *BgDsx<sup>F</sup>* (Wexler et al., 2019). The regulation of *BgDsx* on *BgElo12* thus connects the sex-differentiation  
409 pathway with the HC biosynthesis pathway, and therefore enables the sexual dimorphism of HCs in *B.*  
410 *germanica*.

411 Although the dual-luciferase reporter gene assay suggested that *BgDsx<sup>M</sup>* can directly regulate the  
412 transcript of *BgElo12*, there may be other indirect regulatory pathways. Several candidate factors have been  
413 shown to regulate the HC profiles in various insects (e.g., *D. melanogaster*), including ecdysone, juvenile  
414 hormone (JH), biogenic amine, and the insulin signaling pathway (Wicker et al., 1995a; 1995b; Marican et  
415 al., 2004; Kuo et al., 2012; Bontonou et al., 2015; Fedina et al., 2017; Baron et al., 2018). These connections  
416 are highlighted by ecdysone, which is mainly produced by the prothoracic gland, but in some insects also by  
417 the ovaries (Bownes and Smith, 1984; Romaá et al., 1995), and the development of the ovaries is under the  
418 regulation of the sex-differentiation pathway. Moreover, endocrine signals like JH and insulin are also  
419 regulated by the sex-differentiation pathway (Zinna et al., 2018). Therefore, these signals may be potential  
420 mediators that complete the regulatory network between *BgDsx* and *BgElo12*. However, more detailed  
421 investigations are needed to thoroughly elucidate the differential regulation of HC production in both females  
422 and males.

423 *Dsx* also regulates the HC biosynthesis pathway in *D. melanogaster*; *Dsx<sup>F</sup>* specifically activates the  
424 transcription of *desatF* and generates pheromonal dialkenes (Shirangi et al., 2009). In *B. germanica*, *BgDsx*  
425 operates differently in that *BgDsx<sup>M</sup>* suppresses female traits in male cockroaches, and *BgTra* is important in

426 removing this inhibitory effect in females (Wexler et al., 2019). Thus, *BgDsx<sup>M</sup>* represses the expression of  
427 *BgElo12*, and therefore it represses the generation of female-enriched HCs in males, and *BgTra* is crucial in  
428 maintaining female-enriched HCs, especially for the contact sex pheromone precursors. However, *BgTra*  
429 affects contact sex pheromone biosynthesis in female cockroaches through additional pathways. We found  
430 that RNAi of *BgTra* in females dramatically decreased the expression of the JH-responsive *Krüppel homolog*  
431 *1*, *Krhl*, a zinc-finger transcription factor (Figure 6–figure supplement 6). JH can activate the expression of  
432 a putative sex-specific and rate-limiting cytochrome p450 that catalyzes the hydroxylation of 3,11-DimeC29  
433 to 3,11-DimeC29-alcohol, which is then oxidized to the methyl ketone pheromone (Chase et al., 1992;  
434 Lozano and Belles, 2011), and we found that JH performed this function *via Krhl* (our unpublished data).  
435 Therefore, the influence of *BgTra* on contact sex pheromone biosynthesis is explained not only by its effects  
436 on precursor synthesis, but also for the transition of precursors to methyl ketones.

437

### 438 **Biological significance of the sexual dimorphism of HCs**

439 Sexually dimorphic traits are generated in females and males in response to intra- and inter-sexual  
440 selection, but pleiotropic traits are also subject to natural selection, especially when they are also shaped by  
441 and adapted to environmental stresses (Andersson, 1994; Kunte, 2008). Most insect sex pheromones are C12-  
442 18 aldehydes, alcohols and acetate esters, derived from fatty acids in specialized pheromone glands. These  
443 pheromones appear to have no other function beyond attracting the opposite sex. In contrast, CHC  
444 pheromones appear to serve both in sexual communication and in waterproofing of the cuticle. The female-  
445 specific contact sex pheromone of *B. germanica* is clearly subject to both natural and sexual selection because  
446 it is derived from a prominent CHC, which also serves as a waterproofing component of the CHC profile and  
447 is maternally invested in offspring (Fan et al., 2008). Thus, maintenance of HC contact sex pheromone  
448 precursors in female cockroaches is adaptive in both reproductive success and survival in an arid environment.  
449 The quality of insect pheromones is considered an honest indicator of fitness potential (Kuo et al., 2012).  
450 This assertion may be particularly pertinent in *B. germanica*, where the pheromone and its HC precursor  
451 serve in sexual communication, resilience to environmental stressors, and in maternal investment in eggs.

452 In systems that use CHCs in sexual communication, it is common for the CHC profiles to contain  
453 female- and male-specific components, as is evident in *Drosophila*. In *B. germanica*, as well, male  
454 cockroaches have a unique CHC profile, especially enriched in C27 components with 9-; 11-; 13-; 15-MeC29

455 being particularly prominent. The male-specific HC profile is generated during sexual maturation, suggesting  
456 that it may function in sexual communication. It is possible that the male-enriched 9-, 11-, 13-, 15-MeC29  
457 may function as a sex pheromone in three related contexts: a) it may distinguish males and females within  
458 cockroach aggregations; b) it may signal “maleness” and male quality to females; and c) it may function in  
459 male-male recognition, contests and competition for access to females. Moreover, it is possible that male-  
460 specific P450s may catalyze the oxidation of these male-enriched HCs to homologous methyl ketones, as in  
461 females, and in turn serve these functions. However, more bioassays are required to analyze the biological  
462 significance of male-specific CHC profiles.

## 463 **Materials and Methods**

### 464 **Insect rearing**

465 The German cockroach, *Blattella germanica* originated from a laboratory strain collected in the 1970s.  
466 The cockroaches were maintained in aquaria at  $30 \pm 1^\circ\text{C}$  with a relative humidity (RH) of  $\sim 50\%$  under 12:  
467 12 h light–dark photoperiod regime, and fed rat chow and tap water. Newly hatched cockroaches were  
468 separated and reared in new containers. Early stage (day 1 or 2) fourth- and fifth-instar nymphs were  
469 separated and used in dsRNA injection; newly emerged adults were collected and reared in plastic jars for  
470 experiments.

471

### 472 **Preparation of HCs and methyl ketones**

473 *Blattella germanica* cuticular lipids were extracted following Gu et al. (1995) with slight modifications.  
474 Individual adult female cockroaches were sacrificed by freezing at  $-20^\circ\text{C}$ , and then thawed at room  
475 temperature. Cuticle surface-extracted in 1 mL of hexane twice, and finally rinsed in 1 mL of hexane. *n*-  
476 Hexacosane (15  $\mu\text{g}$ ) or 14-heptacosanone (0.5  $\mu\text{g}$ ) were added as internal standards. The extracts were  
477 combined and reduced to  $\sim 300$   $\mu\text{L}$  with a nitrogen flow and loaded onto a Pasteur pipette mini-column, as  
478 previously described (Pei et al., 2019). The cuticular hydrocarbons were eluted with 8 mL of hexane, and the  
479 contact sex pheromone fraction was subsequently eluted with 8 mL of 3% ethyl ether in hexane. Internal  
480 lipids were extracted from the cockroach following a procedure described by Fan et al. (2002) with slight  
481 modifications. Each surface-extracted cockroach was homogenized in a solution of hexane–methanol–  
482 ddH<sub>2</sub>O (2:1:1 mL), 30  $\mu\text{g}$  of *n*-hexacosane and 1  $\mu\text{g}$  of 14-heptacosanone were added for quantification of  
483 internal HCs and methyl ketones, respectively. The homogenate was vigorously vortexed and centrifuged at  
484 2500 g for 10 min. The supernatant hexane phase was collected and the extraction was repeated using *n*-  
485 hexane. Separation of HCs and methyl ketones was performed using column chromatography, as described  
486 above.

487

### 488 **Gas chromatography–mass spectrometry (GC–MS) analysis**

489 Lipid analysis was performed with a TRACE 1310 GC–ISQ single quadrupole MS (Thermo Fisher  
490 Scientific, Waltham, MA, USA). In brief, lipids were separated on a DB-5MS capillary column (30 m length,

491 0.25 mm ID, 0.25  $\mu\text{m}$  film thickness; Agilent Technologies, Santa Clara, CA, USA). The oven started at  
492 60°C and kept for 2 min, heated to 160°C for HCs and methyl ketones, or 220°C for fatty acid methyl esters  
493 (FAMES) at a rate of 30°C/min, then increased at 3°C/min up to 250°C, followed by 10°C/min up to 320°C  
494 and held for 5 min. Electron ionization mode (70 eV) was used, and the MS scan range was 45–650 m/z at a  
495 rate of 5 scans/s. Identification of compounds and peak area determination was performed with a Xcalibur  
496 2.2 workstation.

497

## 498 **RNA isolation and real time-quantitative PCR (RT-qPCR)**

499 Total RNA was isolated with RNAiso Plus Reagents (Takara, Dalian, Liaoning, China) according to the  
500 manufacturer's instructions. cDNA was reverse-transcribed from 800 ng of total RNA using the  
501 PrimeScript™ RT reagent Kit with gDNA Eraser (Takara). Gene-specific primers with appropriate  
502 amplification efficiency (0.95–1.05) were screened by a cDNA dilution series (Supplementary file 2).  
503 Quantification of gene expression level was performed with TB Green™ Premix Ex Taq™ Tli RNase H Plus  
504 (Takara) on a LightCycler 480 system (Roche). Target genes expression was normalized by the commonly  
505 used housekeeping gene *actin5c* (GenBank: AJ862721.1) and calculated using the  $2^{-\Delta\Delta\text{Ct}}$  method (Livak and  
506 Schmittgen, 2001). Each treatment contained four biological replicates and technical triplicates.

507

## 508 **Identification of *BgElo* gene family members**

509 Both BLASTN and BLASTP were used to search *BgElo* genes in *B. germanica* genome data (Harrison  
510 et al., 2018) and our own full-length transcriptome data (NCBI accessions: SRR9143014 and SRR9143013)  
511 using the homologous genes of *Elongase* from *D. melanogaster* as query sequences. Candidate *BgElo* genes  
512 were amplified with the PrimeSTAR GXL DNA Polymerase reagent (Takara) (primers are listed in  
513 supplementary file 2), the amplified fragments were inserted into the pMD™ 19-T Vector (Takara) and re-  
514 sequenced. Candidate *BgElo* genes were then translated and submitted to SMART online tools  
515 (<http://smart.embl-heidelberg.de>) to analyze the conserved structures; only genes with the typical ELO  
516 domain were confirmed as *BgElo* genes. The putative *BgElo* mRNA sequences were mapped to the genomic  
517 data (GenBank: PYGN00000000.1) using a local BLASTN tool (Altschul et al. 1990), and the intron-exon  
518 structure was analyzed based on the GT-AG rule. The conservative motifs in *BgElos* were analyzed by  
519 sequence alignment with DNAMAN 9.0 software.

520

## 521 **Expression profile analysis**

522 In order to screen the potential *BgElo* genes involved in HC biosynthesis, the expression levels of  
523 different *BgElo* genes were quantified in the fat body and abdominal integument, where HCs or their  
524 precursors were generated. In addition, other tissues including the head, thorax, gut, legs, ovaries, Malpighian  
525 tubules, ejaculatory duct (from two-day-old males), and colleterial glands were dissected from two-day-old  
526 females, and were used to analyze the expression profiles of *BgElo12* and *BgElo24* among different tissues.  
527 In order to study the time course of *BgElo12*, *BgElo24*, *BgDTra*, and *BgDsx* transcript levels during sexual  
528 maturation, a representative nymphal stage (four-day-old sixth-instar nymph, N6D4) and AD0–AD6 females  
529 and males were collected. Total RNA was extracted from various tissues or intact cockroaches, and the  
530 expression profiles of different genes were studied *via* RT-qPCR.

531

## 532 **Transcript knockdown *via* RNAi**

533 Gene-specific target sequences as well as a heterologous fragment from *Mus musculus* (Muslta) used  
534 for double-stranded RNA (dsRNA) synthesis were amplified and cloned into pMD<sup>TM</sup> 19-T Vector (Takara).  
535 Templates used for single-stranded RNA was amplified with primers that were embedded with the T7  
536 promoter sequence (Supplementary file 2). Different kinds of dsRNA were subsequently generated with the  
537 T7 RiboMAX<sup>TM</sup> Express RNAi System (Promega). Delivery of dsRNA was performed with a Nanoject II  
538 micro-injector (Drummond Scientific) for fourth-instar cockroaches and microliter syringes for fifth-, sixth-  
539 instar, and adult cockroaches. For RNAi screen of *BgElo* genes in HC biogenesis, a double injection strategy  
540 was employed: the first injection was performed at the early fifth-instar (one- or two-day-old fifth-instar,  
541 N5D1-N5D2) with a dosage of 3  $\mu$ g in 2  $\mu$ L; the second injection was performed one week later with a  
542 dosage of 4  $\mu$ g in 2  $\mu$ L. For confirming the function of *BgElo12* in contact sex pheromone biosynthesis, a  
543 third injection with 4  $\mu$ g of dsRNA in 2  $\mu$ L was carried out on one-day-old adults (AD1), and methyl ketones  
544 were extracted at AD6. Knockdown of sex-determination genes was accomplished with three dsRNA  
545 injections, the first at early fourth instar (N4D1-N4D2), the second at early fifth instar (N5D1-N5D2), and  
546 the last at early sixth instar (N6D1-N6D2). The fourth-instar cockroaches were injected with  $\sim$ 0.5  $\mu$ g of  
547 dsRNA in  $\sim$ 0.2  $\mu$ L; the fifth- and sixth-instar cockroaches were injected with 1  $\mu$ g of dsRNA in 2  $\mu$ L. In  
548 order to verify the function of *BgElo12* and *BgElo24* in HC biosynthesis and sex-determination genes in

549 modulating *BgElo12* mRNA levels or HC profiles, two non-overlapping gene-specific targets were designed  
550 and used in this study, as there are some isoforms of *BgDsx* and *BgTra*, the RNAi targets were designed  
551 within the common sequence region according to Wexler et al. (2019).

552

## 553 **Heterologous expression and fatty acid analysis**

554 Heterologous expression was performed according to Hastings et al. (2001) with slight modifications.  
555 Complete coding sequences (CDS) of *BgElo12*, *BgElo24*, or control (*GFP*) were amplified with  
556 PrimeSTAR<sup>®</sup> HS DNA Polymerase (Takara) using the gene-specific primers (Supplementary file 2) that  
557 contain the restriction enzyme sites (*KpnI* and *BamHI* for *BgElo12* and *BgElo24*; *BmHI* and *EcoRI* for *GFP*)  
558 and the yeast consensus sequence (TACACA) following the restriction enzyme sites (only for forward  
559 primers). The amplified *BgElo12*, *BgElo24*, or *GFP* CDS fragments were ligated into the linearized pYES2  
560 shuttle plasmid (Thermo Fisher Scientific) and verified by sequencing. The recombinant plasmids were  
561 transformed into INVSc1 *Saccharomyces cerevisiae* (Thermo Fisher Scientific) using the PEG-LiAc method,  
562 and streaked onto *S. cerevisiae* minimal medium minus uracil (SC-Uracil) plates to select transformants;  
563 single colonies were inoculated in SC-Uracil medium with 2% glucose. After culturing at 30°C for 24 h, the  
564 yeast was collected and diluted to an OD<sub>600</sub> of 0.4 with SC-Uracil medium containing 1% raffinose and 2%  
565 galactose, and further cultured at 30°C until they reached an OD<sub>600</sub> of 0.8. At this point, transcription of  
566 exogenous genes was examined by RT-PCR. Substrates of C20 (0.5 mM), C22 (1 mM), C24 (1 mM), C26  
567 (1 mM), C28 (1 mM), 2-methylhexadecanoic acid (0.5 mM), and 14-methylhexadecanoic acid (0.5 mM)  
568 were separately added into the cultures with an extra 1% of tergitol type Nonidet P-40. All the substrates  
569 were purchased from Sigma-Aldrich (Louis, MO, USA) or TCI (Shanghai, China).

570 After 48 h, yeast cells were harvested by centrifugating at 500 g for 5 min and washed thrice with Hank's  
571 balanced salt solution for fatty acid derivatization and analysis. Pellets were dried under a stream of nitrogen  
572 and 2 mL of 1% (v/v) H<sub>2</sub>SO<sub>4</sub> in methanol was added, the mixture was vortexed and incubated at 80 °C water  
573 bath in a N<sub>2</sub> atmosphere for 2 h (Lepage and Roy, 1984). After that, 1 ml of saturated sodium chloride solution  
574 was added into the mixture and FAMES were extracted with 1 mL of hexane for three times. The FAME  
575 extracts were concentrated and subjected to GC-MS analysis as described above. Different FAMES were  
576 identified by comparison to FAME standards (purchased from Sigma-Aldrich) and their mass spectra.

577

## 578 **Desiccation bioassay**

579 The capacity of *BgElo12* and *BgElo24* in water retention was assessed by a desiccation bioassay. Drying  
580 bottles were prepared by putting ~120 g of packed fresh silica gel into a ~900 mL sealed plastic bottle. The  
581 RH inside the bottle dropped to 5% within 2 h which was monitored by HOBO Pro v2 (Onset, Bourne, USA).  
582 AD2 females were injected with *dsBgElo12*, *dsBgELO24*, and *dsMuslta* and separately caged in the  
583 desiccation bottles at 30°C, supplied with ~1 g of dry food, but no water. Survival was recorded every 8 h  
584 until all the cockroaches died. About 100 cockroaches were used for each treatment.

585

## 586 **Courtship behavioral study**

587 Courtship behavior was tested according to Eliyahu et al. (2008b) with slight modifications. Antennae  
588 from differently treated AD3 or AD5 females were excised, and each antenna was attached on the tip of a  
589 glass Pasteur pipette with paraffin, the antenna was used immediately to test the responses of AD13–15 males  
590 that were separated from females since eclosion. The test antenna was used to touch the antennae of the male,  
591 and a positive response was recorded if the male cockroach turned its body and raised wings to approximately  
592 90 degrees within 30 sec. A negative response was recorded if the test antenna failed to elicit a response in a  
593 male cockroach and this male then responded to a positive control antenna from a normal AD6 female. The  
594 wing raising (WR) latency was recorded according to Wada-Katsumata and Schal (2019); the latency of the  
595 WR display was timed from contact of the antennae to the initiation of the male WR display. All female  
596 antennae and male cockroaches were used only once, all tests were performed in the scotophase and we  
597 avoided the first and last 2 h of the scotophase. Bioassays were conducted under a dim red light to simulate  
598 a dark environment.

599

## 600 **Dual-luciferase reporter gene assay**

601 The 5' end of *BgElo12* was obtained by 5' Rapid Amplification of cDNA Ends (RACE), 5' RACE  
602 cDNA library was prepared using Clontech SMARTer RACE 5'/3' Kit (Takara) according to the user manual  
603 with the gene-specific primer (Supplementary file 2) and kit-provided Universal long primer. The amplified  
604 fragments were cloned into pRACE vector and sequenced. About a 2.7 kb sequence upstream of *BgElo12*  
605 was amplified and cloned into pGL3-basic vector, and the CDS sequences of *BgDsx<sup>M</sup>* and GFP (control)



606 were separately cloned into the expression vector pCDNA3.1. The HEK293T cells were cultured in a 24-  
607 well plate with 500  $\mu$ L of DMEM medium (Thermo Fisher Scientific) for 24 h before transfection, and the  
608 restructured pGL3-basic vector (200 ng/well) was co-transfected with the expression vectors (200 ng/well)  
609 to HEK293T cells using Lipofectamine<sup>TM</sup> 3000 (Invitrogen, Carlsbad, CA, USA). The pRL-TK that encoded  
610 a Renilla luciferase was also co-transfected as an internal control. The transfected cells were cultured at 37°C  
611 for 36 h and subjected to luciferase activity analysis using the Dual-Glo Luciferase Assay System (Promega,  
612 Madison, WI, USA).

613

## 614 **Statistics**

615 Data were statistically analyzed using SPSS 23 and presented as mean  $\pm$  SEM or mean  $\pm$  SD.  
616 Two-tailed Student's *t*-test was used for two-group comparison; and significant differences between multi-  
617 groups are analyzed by one-way ANOVA followed by the LSD test (Equal variances assumed) or Welch's  
618 ANOVA followed by Games-Howell multiple comparisons test (Equal variances not assumed) at  $P < 0.05$   
619 level. Principal component analysis (PCA) was used to distinguish the CHC profiles of AD1 and AD6  
620 cockroaches.

621

## 622 Acknowledgments

623 We thank Shan-Wang Hong from Northwest A&F University for his help in sequence analysis. This  
624 work was supported in part by the National Natural Science Foundation of China to YLF (Grant No.  
625 31772533), the United States National Science Foundation (IOS-1557864), the Blanton J. Whitmire  
626 Endowment at North Carolina State University to CS, and the Special Fund of Northwest A&F University to  
627 TXL (NWAUFU-2009-01-001-TXL).

628

629 **Competing interests:** The authors declare that no competing interests exist.

630

## 631 Additional information

### 632 Funding

| Funder                                          | Grant reference number | Author         |
|-------------------------------------------------|------------------------|----------------|
| National Natural Science<br>Foundation of China | Grant No. 31772533     | Yong-Liang Fan |
| United States National<br>Natural Science       | IOS-1557864            | Coby Schal     |
| Northwest A&F University<br>Special Fund        | 2009-01-001-TXL        | Tong-Xian Liu  |

633 The funders had no role in study design, data collection and interpretation,

634 or the decision to submit the work for publication.

635

### 636 Author contributions

637 XJP, Conceptualization, Methodology, Investigation, Collection and analysis of data, Writing—original draft,  
638 Writing—review and editing; YLF, Funding acquisition, Conceptualization, Project administration,  
639 Writing—review and editing; YB, TB, ZFZ, NC, Methodology, Investigation, Writing—review and editing;  
640 SC, Funding acquisition, Conceptualization, Writing—review and editing; SL, Resources, Methodology,  
641 Writing—review and editing; TXL, Funding acquisition, Resources, Supervision, Project administration,

642 Writing—review and editing.

643

644 **Author ORCIDs and Emails:**

645 **Tong-Xian Liu:** [txliu@nwafu.edu.cn](mailto:txliu@nwafu.edu.cn), 0000-0002-7686-0686

646 **Yong-Liang Fan:** [yfan@nwafu.edu.cn](mailto:yfan@nwafu.edu.cn), 0000-0002-7993-2497

647 **Xiao-Jin Pei:** [xiaojinpei@nwafu.edu.cn](mailto:xiaojinpei@nwafu.edu.cn), 0000-0003-4311-6954

648 **Coby Schal:** [coby@ncsu.edu](mailto:coby@ncsu.edu), 0000-0001-7195-6358

649

650 **Data availability**

651 PacBio data sets have been deposited in NCBI's SRA under the accession numbers SRR9143014 and

652 SRR9143013. All *BgElo* sequences have been submitted to NCBI's GenBank under the accession numbers

653 MT925720 and MW380216–MW380238

654

655 **Additional files**

656 **Supplementary file 1.** Sequence alignment and protein structure analysis of BgElos.

657 **Supplementary file 2.** Primer sequences used in this study.

658

## 659 **References**

- 660 Altschul SF, Gish W, Miller W, Myers EW, Lipman DJ. 1990. Basic local alignment search tool. *J Mol*  
661 *Biol* 215:403–410. DOI: [https://doi.org/10.1016/S0022-2836\(05\)80360-2](https://doi.org/10.1016/S0022-2836(05)80360-2).
- 662 Andersson M. 1994. Sexual selection. Princeton, NJ: Princeton University Press.
- 663 Baron A, Denis B, Wicker-Thomas C. 2018. Control of pheromone production by ovaries in *Drosophila*. *J*  
664 *Insect Physiol* 109:138–143. DOI: <https://doi.org/10.1016/j.jinsphys.2018.07.003>.
- 665 Bear A, Monteiro A. 2013. Both cell-autonomous mechanisms and hormones contribute to sexual  
666 development in vertebrates and insects. *BioEssays* 35:725–732. DOI:  
667 <https://doi.org/10.1002/bies.201300009>.
- 668 Berson JD, Simmons LW. 2018. A costly chemical trait: phenotypic condition dependence of cuticular  
669 hydrocarbons in a dung beetle. *J Evol Biol* 31:1772–1781. DOI: <https://doi.org/10.1111/jeb.13371>.
- 670 Berson JD, Garcia-Gonzalez F, Simmons LW. 2019. Experimental evidence for the role of sexual selection  
671 in the evolution of cuticular hydrocarbons in the dung beetle, *Onthophagus taurus*. *J Evol Biol*  
672 32:1186–1193. DOI: <https://doi.org/10.1111/jeb.13519>.
- 673 Blomquist GJ, Tillman JA, Reed JR, Gu P, Vanderwel D, Choi S, Reitz RC. 1995. Regulation of enzymatic  
674 activity involved in sex pheromone production in the housefly, *Musca domestica*. *Insect Biochem Mol*  
675 *Biol* 25:751–757. DOI: [https://doi.org/10.1016/0965-1748\(95\)00015-n](https://doi.org/10.1016/0965-1748(95)00015-n).
- 676 Blomquist GJ, Bagnères AG. 2010. Insect hydrocarbons: biology, biochemistry, and chemical ecology.  
677 Cambridge University Press, New York, USA.
- 678 Blomquist GJ, Ginzl MD. 2021. Chemical ecology, biochemistry, and molecular biology of insect  
679 hydrocarbons. *Annu Rev Entomol* 66:45–60. DOI: [https://doi.org/10.1146/annurev-ento-031620-](https://doi.org/10.1146/annurev-ento-031620-071754)  
680 [071754](https://doi.org/10.1146/annurev-ento-031620-071754).
- 681 Bontonou G, Shaik HA, Denis B, Wicker-Thomas, C. 2015. Acp70A regulates *Drosophila* pheromones  
682 through juvenile hormone induction. *Insect Biochem Mol Biol* 56:36–49. DOI:  
683 <https://doi.org/10.1016/j.ibmb.2014.11.008>.
- 684 Bownes M, Smith T. 1984. Ecdysteroids in adult males and females of *Drosophila melanogaster*. *J Insect*  
685 *Physiol* 30:823–830. DOI: [https://doi.org/10.1016/0022-1910\(84\)90019-2](https://doi.org/10.1016/0022-1910(84)90019-2).
- 686 Chase J, Jurenka RA, Schal C, Halarikar PP, Blomquist GJ. 1990. Biosynthesis of methyl branched  
687 hydrocarbons of the German cockroach *Blattella germanica* (L.) (Orthoptera, Blattellidae). *Insect*

- 688 *Biochem* 20:149-156. DOI: [https://doi.org/10.1016/0020-1790\(90\)90007-H](https://doi.org/10.1016/0020-1790(90)90007-H).
- 689 Chase J, Touhara K, Prestwich GD, Schal C, Blomquist GJ. 1992. Biosynthesis and endocrine control of  
690 the production of the German cockroach sex pheromone 3,11-dimethylnonacosan-2-one. *Proc Natl*  
691 *Acad Sci USA* 89:6050–6054. DOI: <https://doi.org/10.1073/pnas.89.13.6050>.
- 692 Chen N, Pei XJ, Li S, Fan YL, Liu TX. 2020. Involvement of integument-rich *CYP4G19* in hydrocarbon  
693 biosynthesis and cuticular penetration resistance in *Blattella germanica* (L.). *Pest Manag Sci* 76:215–  
694 226. DOI: <https://doi.org/10.1002/ps.5499>.
- 695 Chertemps T, Duportets L, Labeur C, Ueyama M, Wicker-Thomas C. 2006. A female specific desaturase  
696 gene responsible for diene hydrocarbon biosynthesis and courtship behaviour in *Drosophila*  
697 *melanogaster*. *Insect Mol Biol* 15:465–473. DOI: <https://doi.org/10.1111/j.1365-2583.2006.00658.x>.
- 698 Chertemps T, Duportets L, Labeur C, Ueda R, Takahashi K, Saigo K, Wicker-Thomas C. 2007. A female-  
699 biased expressed elongase involved in long-chain hydrocarbon biosynthesis and courtship behavior in  
700 *Drosophila melanogaster*. *Proc Natl Acad Sci USA* 104: 4273–4278.  
701 <https://doi.org/10.1073/pnas.0608142104>.
- 702 Chung H, Loehlin DW, Dufour HD, Vaccarro K, Millar JG, Carroll SB. 2014. A single gene affects both  
703 ecological divergence and mate choice in *Drosophila*. *Science* 343:1148–1151. DOI:  
704 <https://doi.org/10.1126/science.1249998>.
- 705 Chung H, Carroll SB. 2015. Wax, sex and the origin of species: Dual roles of insect cuticular hydrocarbons  
706 in adaptation and mating. *BioEssays* 37:822–830. DOI: <https://doi.org/10.1002/bies.201500014>.
- 707 Clough E, Jimenez E, Kim YA, Whitworth C, Neville MC, Hempel LU, Pavlou HJ, Chen ZX, Sturgill D,  
708 Dale RK, Smith HE, Przytycka TM, Goodwin SF, Van Doren M, Oliver B. 2014. Sex- and tissue-  
709 specific functions of *Drosophila* doublesex transcription factor target genes. *Dev Cell* 31:761–773.  
710 DOI: <https://doi.org/10.1016/j.devcel.2014.11.021>.
- 711 Connallon T, Knowles LL. 2005. Intergenomic conflict revealed by patterns of sex-biased gene expression.  
712 *Trends Genet* 21:495–499. DOI: <https://doi.org/10.1016/j.tig.2005.07.006>.
- 713 Darwin C. 1871. *The descent of man, and selection in relation to sex*. London, UK: J. Murray.
- 714 Eliyahu D, Nojima S, Mori K, Schal C. 2008a. New contact sex pheromone components of the German  
715 cockroach, *Blattella germanica*, predicted from the proposed biosynthetic pathway. *J Chem Ecol*  
716 34:229–237. DOI: <https://doi.org/10.1007/s10886-007-9409-8>.

- 717 Eliyahu D, Nojima S, Capracotta SS, Comins DL, Schal, C. 2008b. Identification of cuticular lipids  
718 eliciting interspecific courtship in the German cockroach, *Blattella germanica*. *Naturwissenschaften*  
719 95:403–412. DOI: <https://doi.org/10.1007/s00114-007-0339-7>.
- 720 Eliyahu D, Nojima S, Mori K, Schal C. 2009. Jail baits: how and why nymphs mimic adult females of the  
721 German cockroach, *Blattella germanica*. *Anim Behav* 78:1097–1105. DOI:  
722 <https://doi.org/10.1016/j.anbehav.2009.06.035>.
- 723 Fan YL, Chase J, Sevala VL, Schal C. 2002. Lipophorin-facilitated hydrocarbon uptake by oocytes in the  
724 German cockroach *Blattella germanica* (L.). *J Exp Biol* 205:781–790. DOI:  
725 <https://jeb.biologists.org/content/205/6/781>.
- 726 Fan YL, Eliyahu D., Schal C. 2008. Cuticular hydrocarbons as maternal provisions in embryos and nymphs  
727 of the cockroach *Blattella germanica*. *J Exp Biol* 211: 548-554. DOI:  
728 <https://jeb.biologists.org/content/211/4/548>.
- 729 Fedina TY, Arbuthnott D, Rundle HD, Promislow D, Pletcher SD. 2017. Tissue-specific insulin signaling  
730 mediates female sexual attractiveness. *PLoS Genet* 13:e1006935. DOI:  
731 <https://doi.org/10.1371/journal.pgen.1006935>.
- 732 Ferveur JF, Sureau G. 1996. Simultaneous influence on male courtship of stimulatory and inhibitory  
733 pheromones produced by live sex-mosaic *Drosophila melanogaster*. *Proc R Soc B* 263:967–973. DOI:  
734 <https://doi.org/10.1098/rspb.1996.0143>.
- 735 Ferveur JF, Savarit F, O'Kane CJ, Sureau G, Greenspan RJ, Jallon JM. 1997. Genetic feminization of  
736 pheromones and its behavioral consequences in *Drosophila* males. *Science* 276:1555–1558. DOI:  
737 <https://doi.org/10.1126/science.276.5318.1555>.
- 738 Gempe T, Beye M. 2011. Function and evolution of sex determination mechanisms, genes and pathways in  
739 insects. *BioEssays* 33:52–60. DOI: <https://doi.org/10.1002/bies.201000043>.
- 740 Gibbs AG, 1998. Water-proofing properties of cuticular lipids. *Am Zool* 38:471–482. DOI:  
741 <https://doi.org/10.1093/icb/38.3.471>.
- 742 Ginzl MD, Blomquist GJ. 2016. Insect hydrocarbons: biochemistry and chemical ecology. In: Cohen, E.,  
743 Moussian, B. (Eds.), *Extracellular Composite Matrices in Arthropods*. Springer, pp. 221–252.
- 744 Gu X, Quilici D, Juarez P, Blomquist GJ, Schal C. 1995. Biosynthesis of hydrocarbons and contact sex  
745 pheromone and their transport by lipophorin in females of the German cockroach (*Blattella*

- 746 *germanica*). *J Insect Physiol* 41:257–267. DOI: [https://doi.org/10.1016/0022-1910\(94\)00100-U](https://doi.org/10.1016/0022-1910(94)00100-U).
- 747 Hall AB, Basu S, Jiang X, Qi Y, Timoshevskiy VA, Biedler JK, Sharakhova MV, Elahi R, Anderson MA,  
748 Chen XG, Sharakhov IV, Adelman ZN, Tu Z. 2015. A male-determining factor in the mosquito *Aedes*  
749 *aegypti*. *Science* 348:1268–1270. DOI: <https://doi.org/10.1126/science.aaa2850>.
- 750 Harrison MC, Jongepier E, Robertson HM, Arning N, Bitard-Feildel T, Chao H, Childers CP, Dinh, H,  
751 Doddapaneni H, Dugan S, Gowin J, Greiner C, Han Y, Hu H, Hughes DST, Huylmans AK, Kemena C,  
752 Kremer LPM, Lee SL, Lopez-Ezquerria A, Mallet L, Monroy-Kuhn JM, Moser A, Murali SC, Muzny  
753 DM, Otani S, Piulachs MD, Poelchau M, Qu J, Schaub F, Wada-Katsumata A, Worley KC, Xie Q, Ylla  
754 G, Poulsen M, Gibbs RA, Schal C, Richards S, Belles X, Korb J, Bornberg-Bauer E. 2018.  
755 Hemimetabolous genomes reveal molecular basis of termite eusociality. *Nat Ecol Evol* 2:557–566.  
756 DOI: <https://doi.org/10.1038/s41559-017-0459-1>.
- 757 Hasselmann M, Gempe T, Schiøtt M, Nunes-Silva CG, Otte M, Beye M. 2008. Evidence for the  
758 evolutionary nascence of a novel sex determination pathway in honeybees. *Nature* 454:519–522. DOI:  
759 <https://doi.org/10.1038/nature07052>.
- 760 Hastings N, Agaba M, Tocher DR, Leaver MJ, Dick JR, Sargent JR, Teale AJ. 2001. A vertebrate fatty acid  
761 desaturase with Delta 5 and Delta 6 activities. *Proc Natl Acad Sci USA* 98:14304–14309. DOI:  
762 <https://doi.org/10.1073/pnas.251516598>.
- 763 Herpin A, Scharlt M. 2015. Plasticity of gene-regulatory networks controlling sex determination: of  
764 masters, slaves, usual suspects, newcomers, and usurpaters. *EMBO Rep* 16:1260–1274. DOI:  
765 <https://doi.org/10.15252/embr.201540667>.
- 766 Holze H, Schrader L, Buellesbach J. 2020. Advances in deciphering the genetic basis of insect cuticular  
767 hydrocarbon biosynthesis and variation. *Heredity*: In press. DOI: [https://doi.org/10.1038/s41437-020-](https://doi.org/10.1038/s41437-020-00380-y)  
768 [00380-y](https://doi.org/10.1038/s41437-020-00380-y).
- 769 Howard RW, Blomquist GJ. 2005. Ecological, behavioral, and biochemical aspects of insect hydrocarbons.  
770 *Annu Rev Entomol* 50:371–393. DOI: <https://doi.org/10.1146/annurev.ento.50.071803.130359>.
- 771 Ingleby FC, Innocenti P, Rundle HD, Morrow EH. 2014. Between-sex genetic covariance constrains the  
772 evolution of sexual dimorphism in *Drosophila melanogaster*. *J Evol Biol* 27:1721–1732. DOI:  
773 <https://doi.org/10.1111/jeb.12429>.
- 774 Innocenti P, Morrow EH. 2010. The sexually antagonistic genes of *Drosophila melanogaster*. *PLoS Biol*

- 775 8:e1000335. DOI: <https://doi.org/10.1371/journal.pbio.1000335>.
- 776 Juárez MP, Chase J, Blomquist GJ. 1992. A microsomal fatty acid synthetase from the integument of  
777 *Blattella germanica* synthesizes methyl-branched fatty acids, precursors to hydrocarbon and contact  
778 sex pheromone. *Arch Insect Biochem Physiol* 293:333–341. DOI: [https://doi.org/10.1016/0003-  
779 9861\(92\)90403-j](https://doi.org/10.1016/0003-9861(92)90403-j).
- 780 Juárez MP, Ayala S, Brenner RR. 1996. Methyl-branched fatty acid biosynthesis in *Triatoma infestans*.  
781 *Insect Biochem Mol Biol* 26:599–605. DOI: [https://doi.org/10.1016/S0965-1748\(96\)00021-5](https://doi.org/10.1016/S0965-1748(96)00021-5).
- 782 Juárez MP. 2004. Fatty acyl-CoA elongation in *Blattella germanica* integumental microsomes. *Arch Insect*  
783 *Biochem Physiol* 56: 170–178. DOI: <https://doi.org/10.1002/arch.20007>.
- 784 Jurenka RA, Schal C, Burns E, Chase J, Blomquist GJ. 1989. Structural correlation between cuticular  
785 hydrocarbons and female contact sex pheromone of German cockroach *Blattella germanica* (L.). *J*  
786 *Chem Ecol* 15:939–949. DOI: <https://doi.org/10.1007/BF01015189>.
- 787 Kiuchi T, Koga H, Kawamoto M, Shoji K, Sakai H, Arai Y, Ishihara G, Kawaoka S, Sugano S, Shimada T,  
788 Suzuki Y, Suzuki MG, Katsuma S. 2014. A single female-specific piRNA is the primary determiner of  
789 sex in the silkworm. *Nature* 509:633–636. <https://doi.org/10.1038/nature13315>.
- 790 Kopp A. 2012. *Dmrt* genes in the development and evolution of sexual dimorphism. *Trends Genet* 28:175–  
791 184. DOI: <https://doi.org/10.1016/j.tig.2012.02.002>.
- 792 Kunte K. 2008. Mimetic butterflies support Wallace's model of sexual dimorphism. *Proc R Soc B*  
793 275:1617–1624. DOI: <https://doi.org/10.1098/rspb.2008.0171>.
- 794 Kuo TH, Fedina TY, Hansen I, Dreisewerd K, Dierick HA, Yew JY, Pletcher S.D. 2012. Insulin signaling  
795 mediates sexual attractiveness in *Drosophila*. *PLoS Genet* 8:e1002684. DOI:  
796 <https://doi.org/10.1371/journal.pgen.1002684>.
- 797 Lepage G, Roy C. 1984. Improved recovery of fatty acid through direct transesterification without prior  
798 extraction or purification. *J Lipid Res* 25:1391–1396.
- 799 Legendre A, Miao XX, Da Lage JL, Wicker-Thomas C. 2008. Evolution of a desaturase involved in female  
800 pheromonal cuticular hydrocarbon biosynthesis and courtship behavior in *Drosophila*. *Insect Biochem*  
801 *Mol Biol* 38:244–255. DOI: <https://doi.org/10.1016/j.ibmb.2007.11.005>.
- 802 Li DT, Chen X, Wang XQ, Zhang CX. 2019a. *FAR* gene enables the brown planthopper to walk and jump  
803 on water in paddy field. *Sci China Life Sci* 62:1521–1531. DOI: [32 / 61](https://doi.org/10.1007/s11427-018-</a></p></div><div data-bbox=)



- 804 [9462-4.](#)
- 805 Li DT, Chen X, Wang XQ, Moussian, B, Zhang CX. 2019b. The fatty acid elongase gene family in the  
806 brown planthopper, *Nilaparvata lugens*. *Insect Biochem Mol Biol* 108:32–43. DOI:  
807 <https://doi.org/10.1016/j.ibmb.2019.03.005>.
- 808 Livak KJ, Schmittgen TD, 2001. Analysis of relative gene expression data using real-time quantitative PCR  
809 and the 2(-Delta Delta C(T)) method. *Methods* 25:402–408. DOI:  
810 <https://doi.org/10.1006/meth.2001.1262>.
- 811 Lozano J, Belles X. 2011. Conserved repressive function of Krüppel homolog 1 on insect metamorphosis in  
812 hemimetabolous and holometabolous species. *Sci Rep* 1:163. <https://doi.org/10.1038/srep00163>.
- 813 MacLean M, Nadeau J, Gurnea T, Tittiger C, Blomquist GJ. 2018. Mountain pine beetle (*Dendroctonus*  
814 *ponderosae*) *CYP4Gs* convert long and short chain alcohols and aldehydes to hydrocarbons. *Insect*  
815 *Biochem Mol Biol* 102:11–20. DOI: <https://doi.org/10.1016/j.ibmb.2018.09.005>.
- 816 Mank JE. 2017. The transcriptional architecture of phenotypic dimorphism. *Nature Ecol Evol* 1:6. DOI:  
817 <https://doi.org/10.1038/s41559-016-0006>.
- 818 Marican C, Duportets L, Birman S, Jallon JM. 2004. Female-specific regulation of cuticular hydrocarbon  
819 biosynthesis by dopamine in *Drosophila melanogaster*. *Insect Biochem Mol Biol* 34:823–830. DOI:  
820 <https://doi.org/10.1016/j.ibmb.2004.05.002>.
- 821 Moon YA, Shah NA, Mohapatra S, Warrington JA, Horton JD. 2001. Identification of a mammalian long  
822 chain fatty acyl elongase regulated by sterol regulatory element-binding proteins. *J Biol Chem*  
823 276:45358–45366. DOI: <https://doi.org/10.1074/jbc.M108413200>.
- 824 Nojima S, Nishida R, Kuwahara Y, Sakuma M. 1999. Nuptial feeding stimulants: a male courtship  
825 pheromone of the German cockroach, *Blattella germanica* (L.) (Dictyoptera: Blattellidae).  
826 *Naturwissenschaften* 86:193-196. DOI: <https://doi.org/10.1007/s001140050596>.
- 827 Oh, CS, Toke DA, Mandala S, Martin CE. 1997. *ELO2* and *ELO3*, Homologues of the *Saccharomyces*  
828 *cerevisiae* *ELO1* gene, function in fatty acid elongation and are required for sphingolipid formation. *J*  
829 *Boil Chem* 272:17376–17384. DOI: <https://doi.org/10.1074/jbc.272.28.17376>.
- 830 Ohno Y, Suto S, Yamanaka M, Mizutani Y, Mitsutake S, Igarashi Y, Sassa T, Kihara A. 2010. ELOVL1  
831 production of C24 acyl-CoAs is linked to C24 sphingolipid synthesis. *Proc Natl Acad Sci USA*  
832 107:18439–18444. DOI: <https://doi.org/10.1073/pnas.1005572107>.

- 833 Parvy JP, Napal L, Rubin T, Poidevin M, Perrin L, Wicker-Thomas C, Montagne J. 2012. *Drosophila*  
834 *melanogaster* Acetyl-CoA-carboxylase sustains a fatty acid-dependent remote signal to waterproof the  
835 respiratory system. *PLoS Genets* 8:e1002925. DOI: <https://doi.org/10.1371/journal.pgen.1002925>.
- 836 Pei XJ, Chen N, Bai Y, Qiao JW, Li S, Fan YL, Liu TX. 2019. *BgFasI*: A fatty acid synthase gene required  
837 for both hydrocarbon and cuticular fatty acid biosynthesis in the German cockroach, *Blattella*  
838 *germanica* (L.). *Insect Biochem Mol Biol* 112:103203. DOI:  
839 <https://doi.org/10.1016/j.ibmb.2019.103203>.
- 840 Pfannenstiel RS, Booth W, Vargo EL, Schal C. 2008. *Blattella asahinai* (Dictyoptera: Blattellidae): A new  
841 predator of lepidopteran eggs in south Texas soybean. *Ann Entomol Soc Am* 101:763–768.
- 842 Prakash A, Monteiro A. 2016. Molecular mechanisms of secondary sexual trait development in insects.  
843 *Curr Opin Insect Sci* 17:40–48. DOI: <https://doi.org/10.1016/j.cois.2016.06.003>.
- 844 Qiu Y, Tittiger C, Wicker-thomas C, Goff LG, Young S, Wajnberg E, Fricaux T, Taquet N, Blomquist GJ,  
845 Feyereisen R. 2012. An insect-specific p450 oxidative decarboxylase for cuticular hydrocarbon  
846 biosynthesis. *Proc Natl Acad Sci USA* 109:14858–14863. DOI:  
847 <https://doi.org/10.1073/pnas.1208650109>.
- 848 Rogers TF, Palmer DH, Wright AE. 2020. Sex-specific selection drives the evolution of alternative splicing  
849 in birds. *Mol Biol Evol*: In press. DOI: <https://doi.org/10.1093/molbev/msaa242>.
- 850 Romaá I, Pascual, N, X. Bellés. 1995. The ovary is a source of circulating ecdysteroids in *Blattella*  
851 *germanica* (Dictyoptera: Blattellidae). *Eur J Entomol* 92:93-103.
- 852 Schal C, Burns EL, Jurenka RA, Blomquist GJ. 1990. A new component of the female sex pheromone of  
853 *Blattella germanica* (L.) (Dictyoptera: Blattellidae) and interaction with other pheromone components.  
854 *J Chem Ecol* 16:1997–2008. DOI: <https://doi.org/10.1007/BF01020511>.
- 855 Schal C, Gu X, Burns EL, Blomquist GJ. 1994. Patterns of biosynthesis and accumulation of hydrocarbons  
856 and contact sex pheromone in the female German cockroach, *Blattella germanica*. *Arch Insect*  
857 *Biochem Physiol* 25:375–391. DOI: <https://doi.org/10.1002/arch.940250411>.
- 858 Schal C, Chiang AS. 1995. Hormonal control of sexual receptivity in cockroaches. *Experientia* 51:994–  
859 998. DOI: <https://doi.org/10.1007/BF01921755>.
- 860 Schal C, Sevala V, Cardé RT. 1998. Novel and highly specific transport of a volatile sex pheromone by  
861 hemolymph lipophorin in moths. *Naturwissenschaften* 85: 339–342. DOI:

- 862 <https://doi.org/10.1007/s001140050511>.
- 863 Schal C, Sevala V, Capurro ML, Snyder TE, Blomquist GJ, Bagnères AG. 2001. Tissue distribution and  
864 lipophorin transport of hydrocarbons and sex pheromones in the house fly, *Musca domestica*. *J Insect*  
865 *Sci* 1:12.
- 866 Schal C. 2011. Cockroaches. In Hedges S, Moreland D, editors, Handbook of Pest Control, chapter 2, pages  
867 150–291. Pennsylvania State University: GIEMedia.
- 868 Shirangi TR, Dufour HD, Williams TM, Carroll SB. 2009. Rapid evolution of sex pheromone-producing  
869 enzyme expression in *Drosophila*. *PLoS Biol* 7:e1000168. DOI:  
870 <https://doi.org/10.1371/journal.pbio.1000168>.
- 871 Tanaka K, Barmina O, Sanders LE, Arbeitman MN, Kopp A. 2011. Evolution of sex-specific traits through  
872 changes in HOX-dependent *doublesex* expression. *PLoS Biol* 9:e1001131. DOI:  
873 <https://doi.org/10.1371/journal.pbio.1001131>.
- 874 Toke DA, Martin CE. 1996. Isolation and characterization of gene affecting fatty acid elongation in  
875 *Saccharomyces cerevisiae*. *J Biol Chem* 271:18413–18422. DOI:  
876 <https://doi.org/10.1074/jbc.271.31.18413>.
- 877 Verhulst EC, van de Zande L. 2015. Double nexus—*Doublesex* is the connecting element in sex  
878 determination. *Brief Funct Genomics* 14:396–406. DOI: <https://doi.org/10.1093/bfgp/elv005>.
- 879 Wada-Katsumata A Schal, C. 2019. Antennal grooming facilitates courtship performance in a group-living  
880 insect, the German cockroach *Blattella germanica*. *Sci Rep* 9:2942. DOI:  
881 <https://doi.org/10.1038/s41598-019-39868-x>.
- 882 Wexler J, Delaney EK, Belles X, Schal C, Wada-Katsumata A, Amicucci MJ, Kopp A. 2019.  
883 Hemimetabolous insects elucidate the origin of sexual development via alternative splicing. *eLife*  
884 8:e47490. DOI: <https://doi.org/10.7554/eLife.47490>.
- 885 Wicker C, Jallon JM. 1995a. Hormonal control of sex pheromone biosynthesis in *Drosophila melanogaster*.  
886 *J Insect Physiol* 41:65–70. DOI: [https://doi.org/10.1016/0022-1910\(94\)00074-Q](https://doi.org/10.1016/0022-1910(94)00074-Q).
- 887 Wicker C, Jallon JM. 1995b. Influence of ovary and ecdysteroids on pheromone biosynthesis in *Drosophila*  
888 *melanogaster* (Diptera: Drosophilidae). *Eur J Entomol* 92:197202.
- 889 Wicker-Thomas C, Garrido D, Bontonou G, Napal L, Mazuras N, Denis B, Rubin T, Parvy JP, Montagne J.  
890 2015. Flexible origin of hydrocarbon/pheromone precursors in *Drosophila melanogaster*. *J Lipid Res*

- 891 56:2094–2101. DOI: <https://doi.org/10.1194/jlr.M060368>.
- 892 Williams TM, Selegue JE, Werner T, Gompel N, Kopp A, Carroll SB. 2008. The regulation and evolution  
893 of a genetic switch controlling sexually dimorphic traits in *Drosophila*. *Cell* 134:610–623. DOI:  
894 <https://doi.org/10.1016/j.cell.2008.06.052>.
- 895 Yew JY, Chung H. 2015. Insect pheromones: An overview of function, form, and discovery. *Prog Lipid Res*  
896 59:88–105. DOI: <https://doi.org/10.1016/j.plipres.2015.06.001>.
- 897 Young HP, Larabee JK, Gibbs AG, Schal C. 2000. Relationship between tissue-specific hydrocarbon  
898 profiles and lipid melting temperatures in the cockroach *Blattella germanica*. *J Chem Ecol* 26:1245-  
899 1263. DOI: <https://doi.org/10.1023/A:1005440212538>.
- 900 Zhang Z, Klein J, Nei M. 2014a. Evolution of the *sex-lethal* gene in insects and origin of the sex-  
901 determination system in *Drosophila*. *J Mol Evol* 78:50–65. DOI: <https://doi.org/10.1007/s00239-013-9599-3>.
- 902 [9599-3](https://doi.org/10.1007/s00239-013-9599-3).
- 903 Zhang B, Xue HJ, Song KQ, Liu J, Li WZ, Nie RE, Yang XK. 2014b. Male mate recognition via cuticular  
904 hydrocarbons facilitates sexual isolation between sympatric leaf beetle sister species. *J Insect Physiol*  
905 70:15–21. DOI: <https://doi.org/10.1016/j.jinsphys.2014.08.006>.
- 906 Zhao X, Yang Y, Niu N, Zhao Y, Zhang J. 2020. The fatty acid elongase gene *LmElo7* is required for  
907 hydrocarbon biosynthesis and cuticle permeability in the migratory locust, *Locusta migratoria*. *J*  
908 *Insect Physiol* 123: 104052. DOI: <https://doi.org/10.1016/j.jinsphys.2020.104052>.
- 909 Zinna RA, Gotoh H, Kojima T, Niimi T. 2018. Recent advances in understanding the mechanisms of  
910 sexually dimorphic plasticity: insights from beetle weapons and future directions. *Curr Opin Insect Sci*  
911 25:35–41. DOI: <https://doi.org/10.1016/j.cois.2017.11.009>.
- 912

913 **Figures and figure legends**

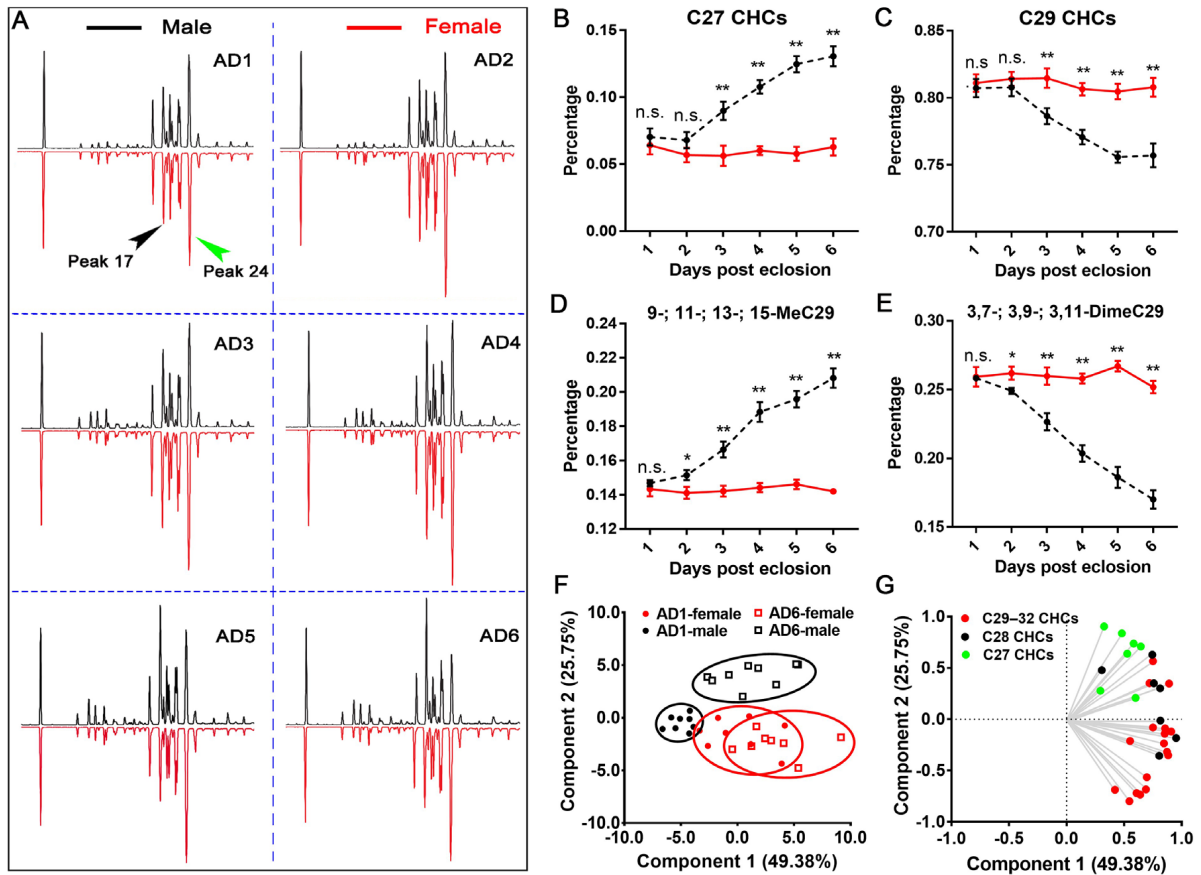

914  
 915 **Figure 1.** Development of sexually dimorphic cuticular hydrocarbons. **(A)** Comparisons of 1- to 6-day-old adult  
 916 (AD1–AD6) male (black) and female (red) cuticular hydrocarbon profiles. The first peak represents the internal  
 917 standard *n*-hexacosane. Other peaks correspond to the CHCs in Source data 1. Peak 17 is male-enriched (9-; 11-;  
 918 13-; 15-MeC29) and gradually increased with age in males. Peak 24 is female-enriched (3,7-; 3,9-; 3,11-  
 919 DimeC29). The proportions of C27 CHCs **(B)**, C29 CHCs **(C)**, Peak 17 **(D)**, and Peak 24 **(E)** in the total CHCs  
 920 from AD1 to AD6 were compared between males (black dotted lines) and females (solid red lines). Data are  
 921 shown as mean ± SEM (n.s. represent no significant difference; \**P* < 0.05, \*\**P* < 0.01, two-tailed Student’s *t*-  
 922 test, n = 8–10). **(F, G)** Principal component analysis of AD1 and AD6 CHC profiles of males and females. In **(F)**,  
 923 each dot represents a datum calculated from one cockroach. AD1 male (black solid circles) and female (red solid  
 924 circles) CHC profiles overlapped, whereas AD6 male (black open square) and female (red open square) CHC  
 925 profiles separated along PC2. In the loading diagram **(G)**, CHCs with different chain lengths are marked by  
 926 green (C27), black (C28), and red (C29–C32), showing that C27 CHCs vectored toward males along PC2,  
 927 whereas longer chain CHCs vectored toward females.

928

929 The following Source data and figure supplements are available for figure 1:

930 **Source data 1.** Quantification of different cuticular hydrocarbons during sexually dimorphic cuticular  
931 hydrocarbon generation.  
932 **Figure 1–figure supplement 1.** Cuticular hydrocarbon profiles of 4-day-old sixth-instar nymphs of *Blattella*  
933 *Germanica*.  
934

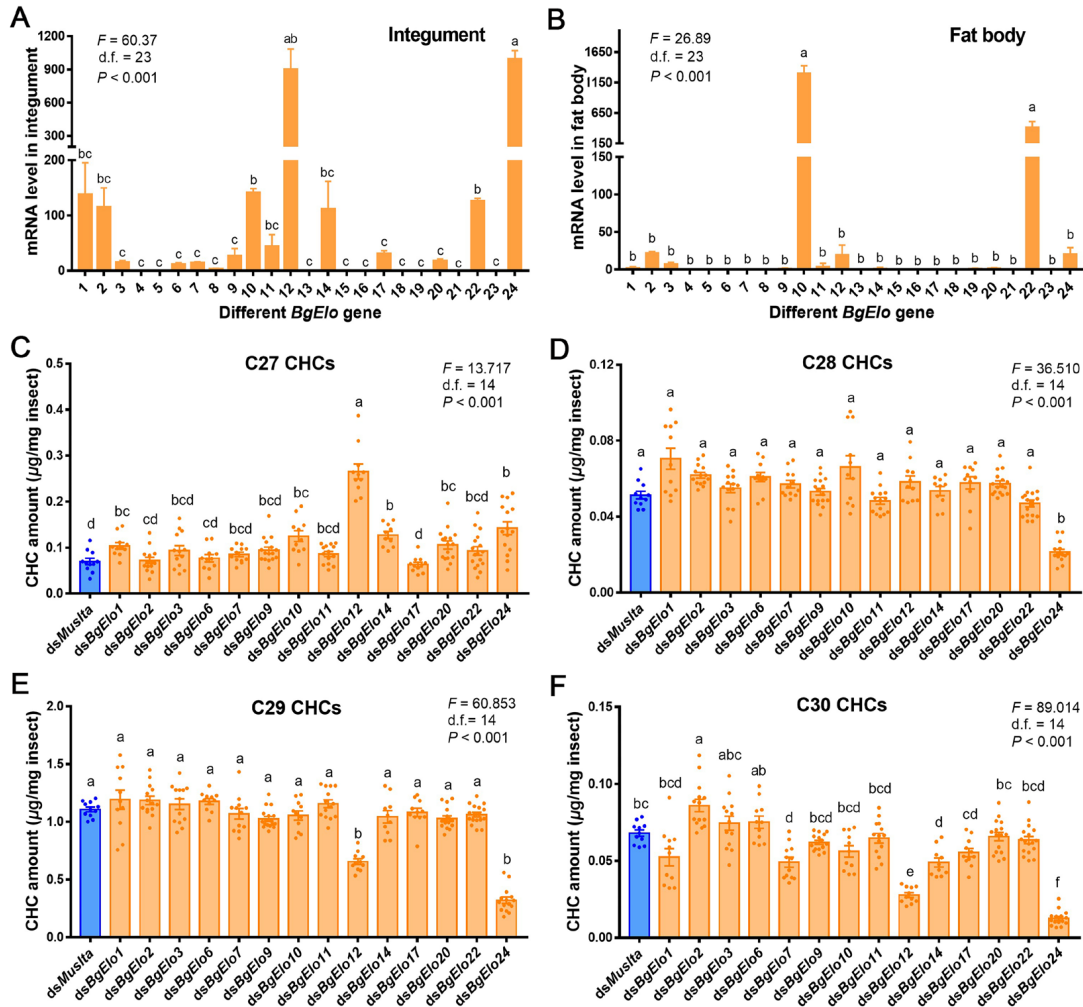

935

936 **Figure 2.** RNAi screen to identify *BgElo* genes involved in long-chain cuticular hydrocarbon biosynthesis.

937 Transcript levels of different *BgElo* genes in the abdominal integument (A) and fat body (B). The numbers on

938 the abscissa correspond to *BgElo*1–24. Data are shown as mean ± SEM, and calculated from 4 replicates (each

939 replicate contains 4 cockroaches for the integument and 8 cockroaches for the fat body). The influence of

940 knockdown of different *BgElo* genes on C27 (C), C28 (D), C29 (E), C30, and (F) CHCs is shown. Data are

941 presented as mean ± SEM and calculated from 10–16 AD2 female cockroaches, each dot indicating a single

942 datum from one cockroach. Only RNAi of *BgElo*12 and *BgElo*24 resulted in significant increases of C27 CHCs

943 and decreases of C29 CHCs. Different letters indicate statistically significant differences between groups using

944 Welch's ANOVA (Games-Howell multiple comparisons test,  $P < 0.05$ ).

945

946 The following Source data and figure supplements are available for figure 2:

947 **Source data 2.** Quantification of individual cuticular hydrocarbons after RNAi of other *BgElo* genes.

948 **Figure 2–figure supplement 1.** RNAi efficiency of different *BgElo* genes in *Blattella germanica*.

949 **Figure 2–figure supplement 2.** Influence of *BgElo*-RNAi on cuticular hydrocarbons with chain length longer  
950 than 30 carbons.  
951  
952



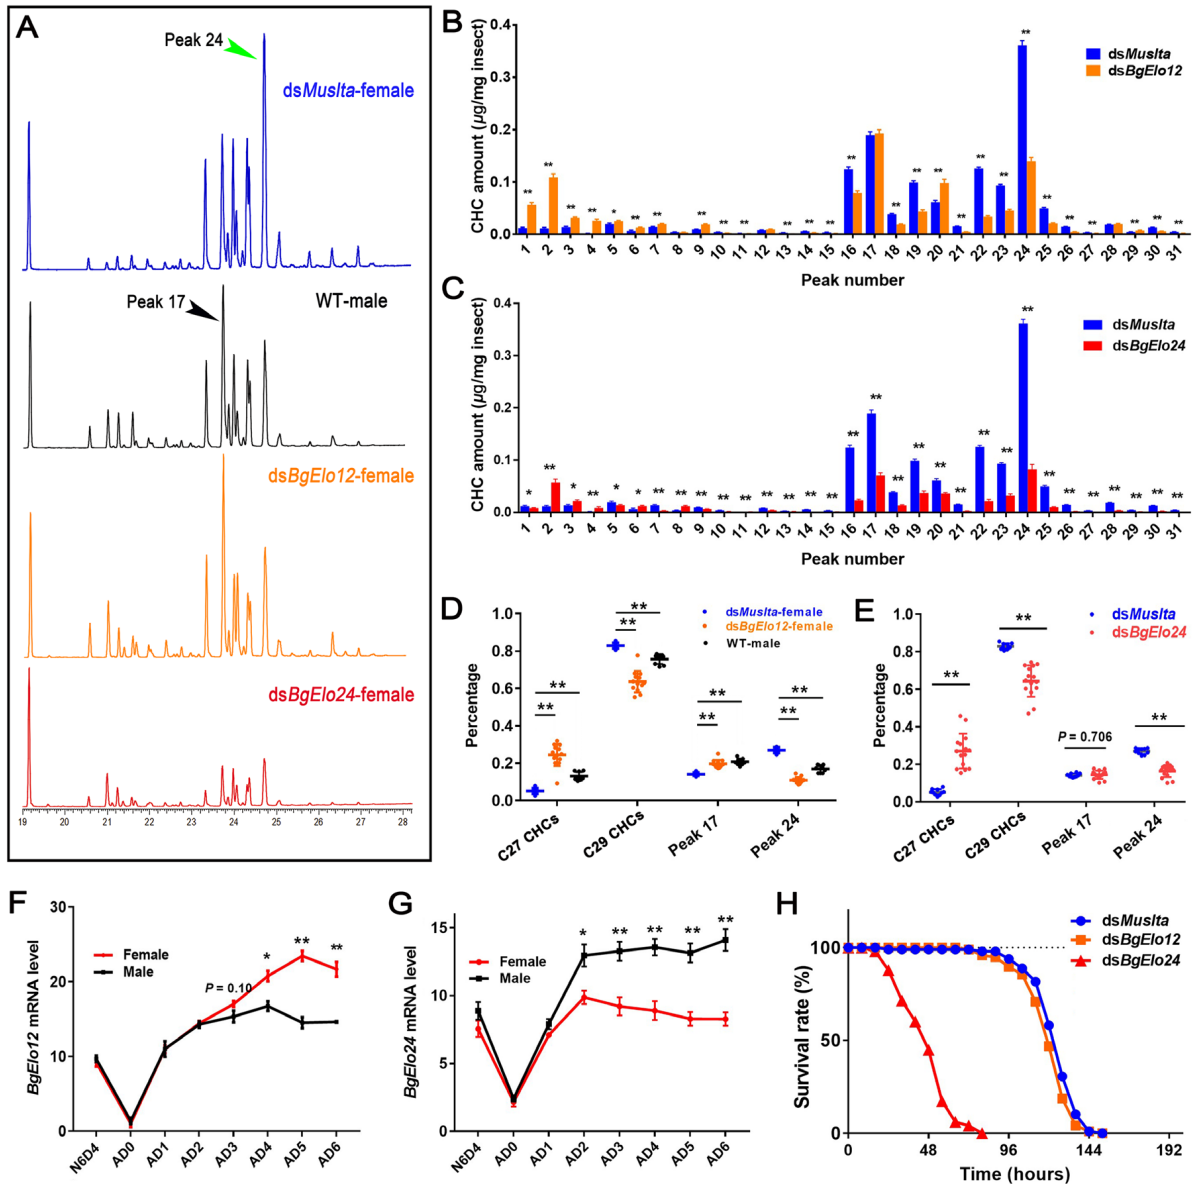

953

954 **Figure 3.** *BgElo12* is involved in generating sexually dimorphic hydrocarbons. **(A)** Gas chromatogram of CHC

955 profiles from differently treated cockroaches. The CHC profiles of sexually mature females and males (AD6–

956 AD8) showed a marked difference, and RNAi of only *BgElo12* in females generated a male-like CHC profile.

957 Quantitative influence of *BgElo12*-RNAi **(B)** and *BgElo24*-RNAi **(C)** in females on the amount of each CHC.

958 Percentage change of the C27 CHCs, C29 CHCs, male-enriched peak 17, and female-enriched peak 24 after

959 *BgElo12*-RNAi **(D)** or *BgElo24*-RNAi **(E)**. Data in **(B–E)** are shown as mean ± SEM, \* $P < 0.05$ , \*\* $P < 0.01$ ;

960 two-tailed Student's *t*-test,  $n = 10$  for *dsMuslta*, 11 for *dsBgElo12*, and 15 for *dsBgElo24*, 9 for wild type males

961 (WT-male). Relative expression of *BgElo12* **(F)** and *BgElo24* **(G)** among different developmental stages and

962 different ages of adult males and females.  $P$  values were calculated from 4 replicates (2–3

963 cockroaches/replicate), \*\* $P < 0.01$ ; two-tailed Student's *t*-test. **(H)** Survival rates of *dsMuslta* ( $n = 98$ ),

964 *dsBgElo12* (n = 96), and *dsBgElo24* (n = 98) treated female cockroaches maintained at 5% RH. Survival rates  
965 were calculated every 8 h until all cockroaches died.

966

967 The following figure supplements are available for figure 3:

968 **Figure 3–figure supplement.** Influence of *BgElo12*-RNAi and *BgElo24*-RNAi on CHC profiles of male *B.*  
969 *germanica*.

970 **Figure 3–figure supplement 2.** Verifying the influences of *BgElo12* and *BgElo24* on hydrocarbon biosynthesis  
971 by using the second RNAi targets and examining changes of internal hydrocarbons.

972 **Figure 3–figure supplement 3.** Tissue-specific expression of *BgElo12* and *BgElo24*.

973

974

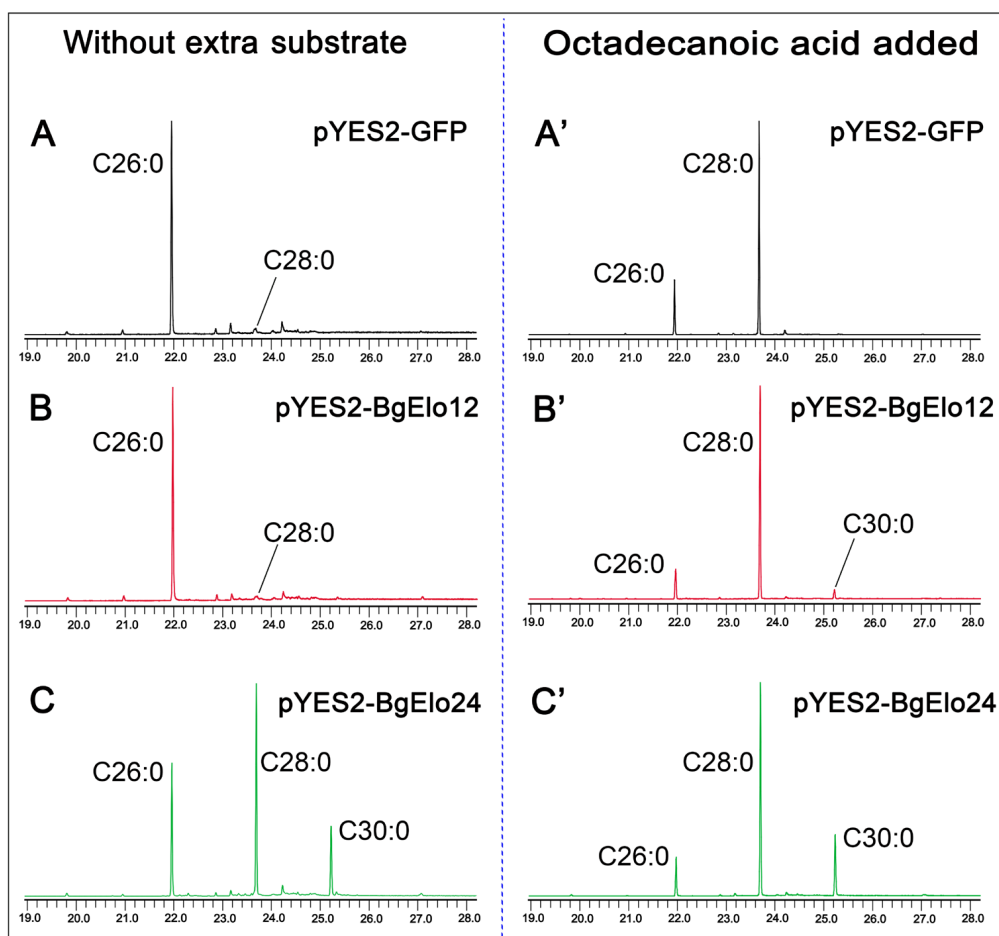

975  
976 **Figure 4.** Yeast expression and substrate catalysis of BgElo12 and BgElo24. Representative gas chromatogram  
977 of fatty acid methyl esters of yeast transformed with pYES2-GFP (A), pYES2-BgElo12 (B), and pYES2-  
978 BgElo24 (C) without adding of extra substrates. After adding octacosanoic acid (C28:0), the corresponding  
979 chromatograms are shown at the right for pYES2-GFP (A'), pYES2-BgElo12 (B'), and pYES2-BgElo24 (C').  
980 The chromatograms are truncated, and only chromatographic peaks of interest are indicated. The FAMES are  
981 labeled by their corresponding saturated FAs. Complete chromatograms are shown in Figure 4–supplement  
982 figure 1.

983  
984 The following source data and figure supplements are available for figure 4:

985 **Source data 3.** Calculation of the proportions of different fatty acid methyl esters in the yeast expression.

986 **Figure 4–figure supplement 1.** Heterologous expression of BgElo12 and BgElo24 with methyl-branched  
987 substrates.

988

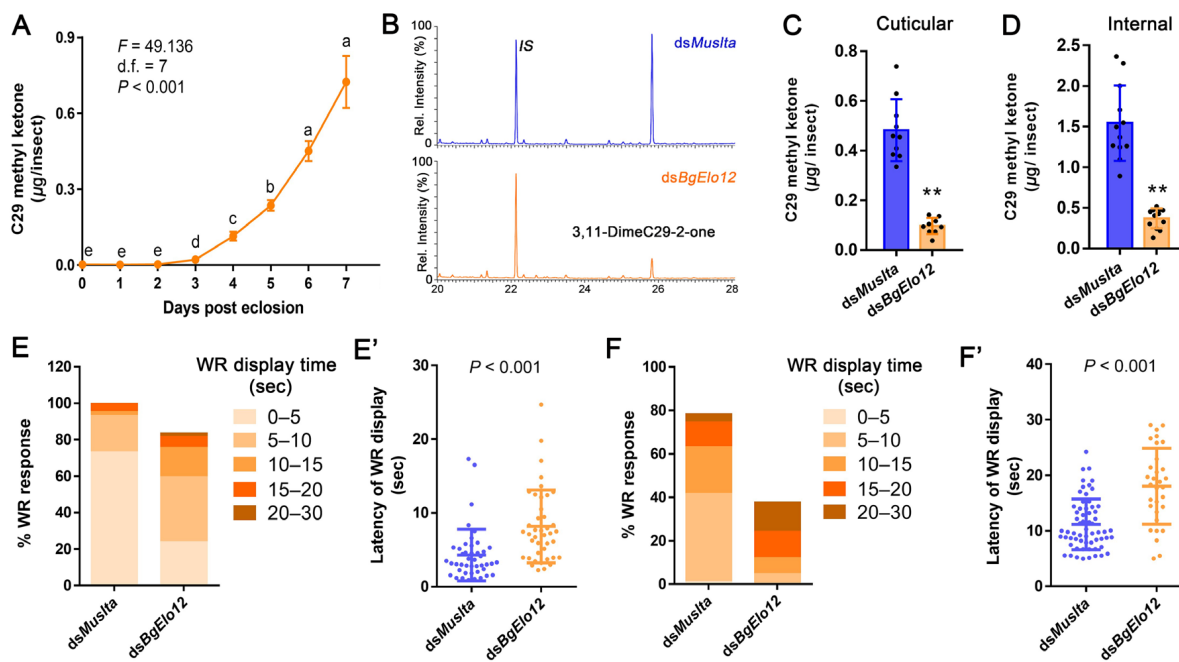

989

990 **Figure 5.** *BgElo12*-RNAi effects on contact sex pheromone biosynthesis in females and male courtship

991 performance. **(A)** The pattern of contact sex pheromone (3,11-DimeC29-2-one) accumulation during female

992 sexual maturation. Data are shown as mean  $\pm$  SEM. Different letters indicate significant differences between

993 groups using Welch's ANOVA (Games-Howell multiple comparisons test,  $P < 0.05$ ). **(B)** Representative

994 chromatogram showing lower amounts of sex pheromone after *BgElo12*-RNAi. *IS* is the internal standard 14-

995 heptacosanone. Cuticular **(C)** and internal **(D)** amounts of 3,11-DimeC29-2-one (C29 methyl ketone) after

996 *BgElo12*-RNAi. Data are shown as mean  $\pm$  SD, and each replicate is shown as a dot.  $**P < 0.01$ , two-tailed

997 Student's *t*-test;  $n = 9$ – $12$ . Influence of *BgElo12*-RNAi on the ability of AD5 **(E–E')** and AD3 **(F–F')** female

998 antennae to elicit courtship in males. The percentage of males that responded with a wing-raising (WR) behavior

999 in response to contact with female antenna were determined for 44 (*dsMuslta*) and 49 (*dsBgElo12*) female

1000 antennae in **(E)**, and 79 (*dsMuslta*) and 82 (*dsBgElo12*) antennae in **(F)**. Each female antenna was tested only

1001 once with a single male. The proportion of WR display over different time periods is shown in progressively

1002 darker colors. **(E')** and **(F')** Average latency of WR display calculated from those antennae that successfully

1003 activated a courtship behavior of males within 30 s. Data are shown as mean  $\pm$  SD, each dot represents a datum

1004 calculated from one antenna.  $P$  values were determined by two-tailed Student's *t*-test.

1005

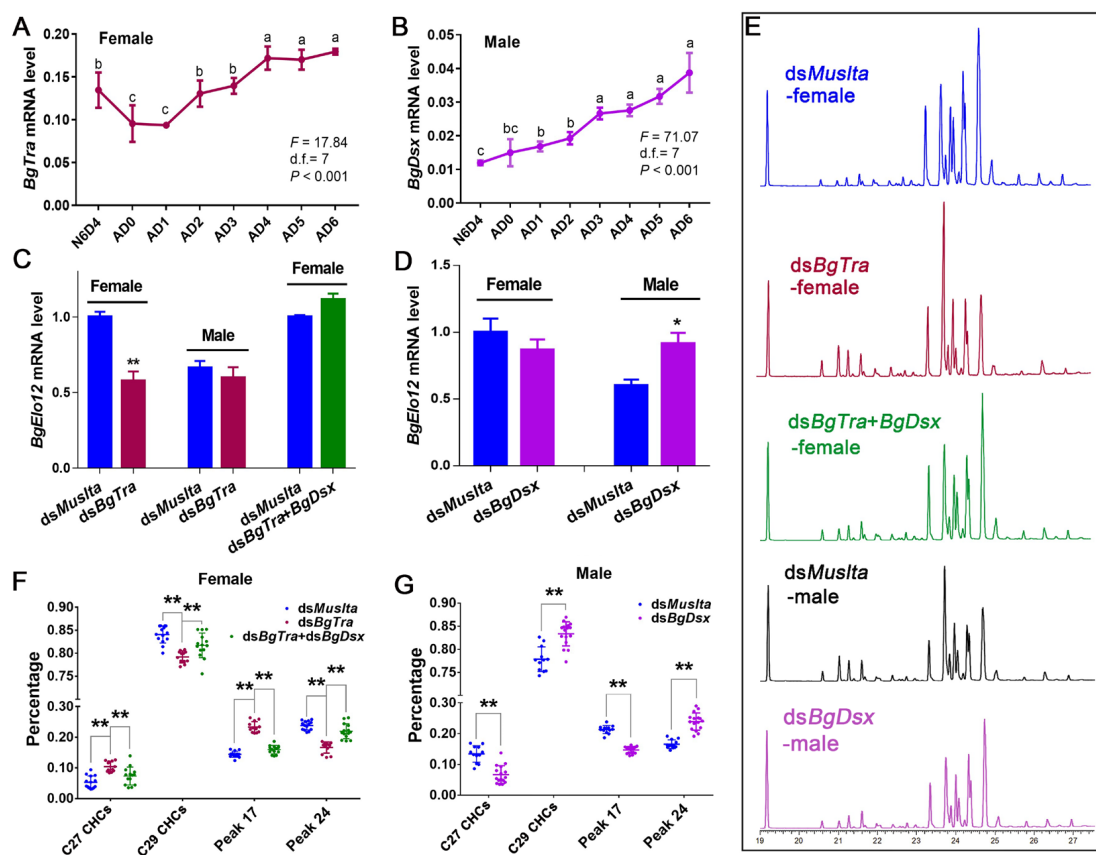

1006  
 1007 **Figure 6.** Regulation of *BgElo12* and sexually dimorphic hydrocarbon profiles by sex-differentiation genes.  
 1008 Temporal patterns of *BgTra* expression in females (**A**) and *BgDsx* expression in males (**B**). Data are shown as  
 1009 mean  $\pm$  SEM and calculated from 4 replicates (2–3 cockroaches/replicate). N6D4 is 6<sup>th</sup> instar nymph on day 4,  
 1010 AD0–6 represent adult days 0 to 6. Different letters indicate significant differences between the groups  
 1011 (ANOVA, Fisher's LSD,  $P < 0.05$ ). (**C**) and (**D**) Regulation of *BgElo12* expression by *BgTra* and *BgDsx*. Data  
 1012 are shown as mean calculated from 4 replicates (2–3 cockroaches/replicate)  $\pm$  SEM; \* $P < 0.05$ , \*\* $P < 0.01$ , two-  
 1013 tailed Student's *t*-test. (**E**) Gas chromatograms of CHCs after repressing different sex-differentiation genes. (**F**)  
 1014 Regulation of the proportions of representative CHCs by *BgTra* in females. Data are presented as mean  $\pm$  SD,  
 1015 \*\* $P < 0.01$ ; two-tailed Student's *t*-test;  $n = 14$  for *dsMuslta*, 12 for *dsBgTra*, and 14 for *dsBgTra+dsBgDsx*. (**G**)  
 1016 The proportion change of representative CHCs after *BgDsx*-RNAi in males. Data are shown as mean  $\pm$  SD; \*\* $P$   
 1017  $< 0.01$ ; two-tailed Student's *t*-test,  $n = 12$  for *dsMuslta* and 16 for *dsBgDsx*.

1018  
 1019 The following figure supplements are available for figure 6:

1020 **Figure 6–figure supplement 1.** Verifying the sex-specific developmental function of *BgTra* and *BgDsx*.

1021 **Figure 6–figure supplement 2.** Transcriptional activity of *BgDsx*<sup>M</sup> on the upstream regulatory sequence of  
 1022 *BgElo12*.

- 1023 **Figure 6–figure supplement 3.** Influence of *BgDsx*-RNAi and *BgTra*-RNAi on *BgElo24* expression.
- 1024 **Figure 6–figure supplement 4.** Regulation of cuticular hydrocarbon profiles by sex-differentiation genes.
- 1025 **Figure 6–figure supplement 5.** Regulation of internal hydrocarbon profiles by sex-differentiation genes.
- 1026 **Figure 6–figure supplement 6.** Regulation of *Krhl* by *BgTra* in females.
- 1027
- 1028

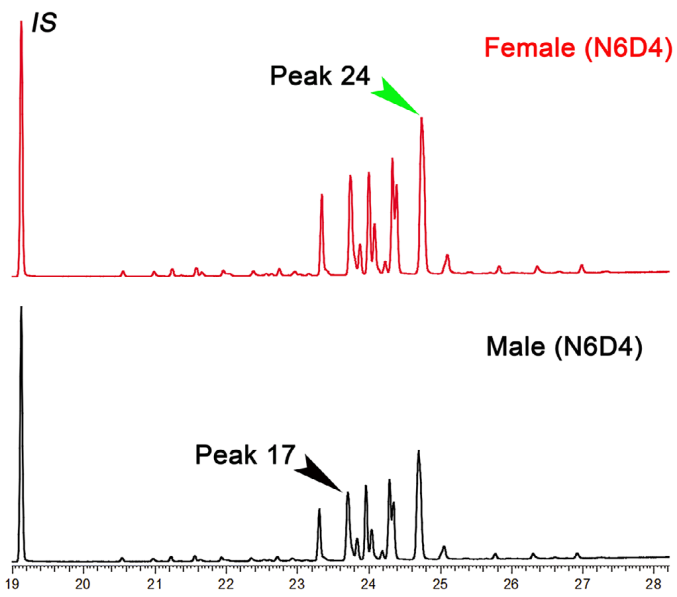

1029

1030 **Figure 1–figure supplement 1.** Cuticular hydrocarbon profiles of 4-day-old sixth-instar nymphs of *Blattella*

1031 *germanica*. Peak 24 represents the female-enriched 3,7-; 3,9-; 3,11-DimeC29, and Peak 17 is the male-enriched

1032 9-; 11-; 13-; 15-MeC29.

1033

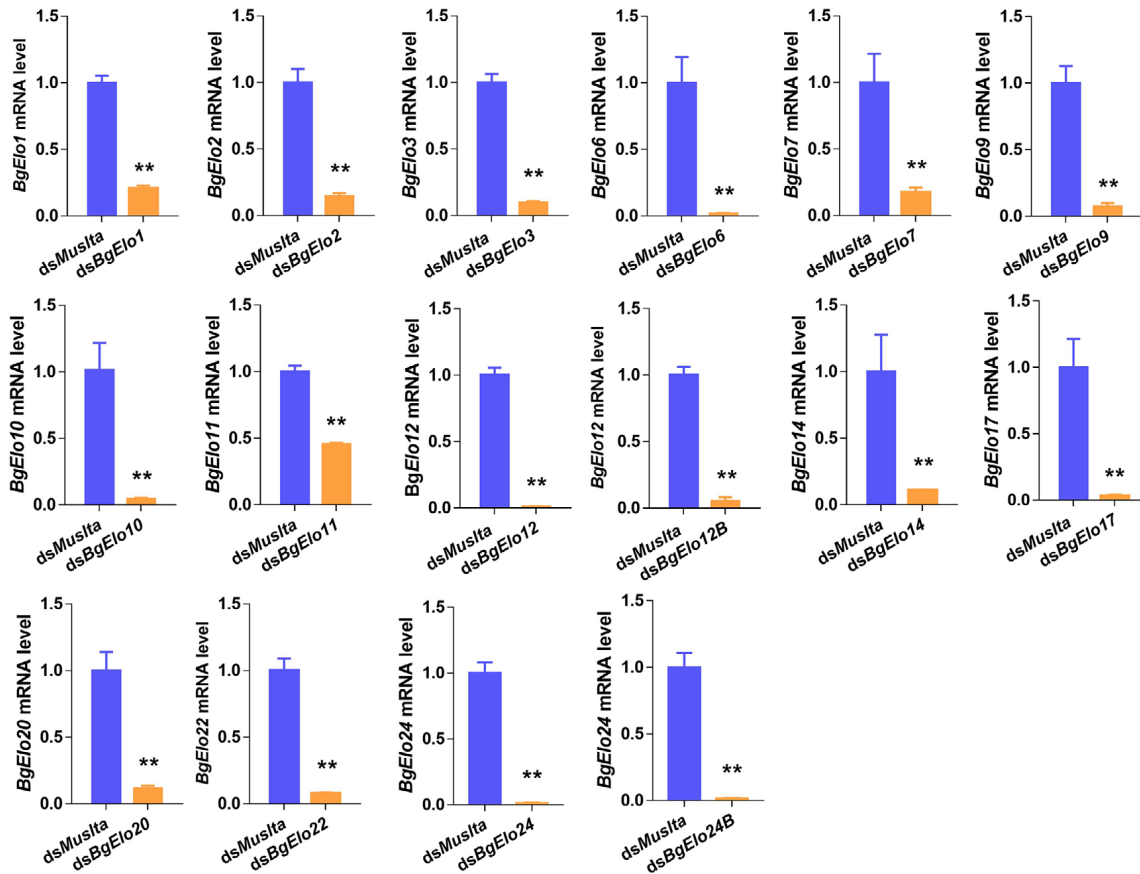

1034

1035 **Figure 2–figure supplement 1.** RNAi efficiency of different *BgElo* genes in *Blattella germanica*. Data are

1036 shown as mean  $\pm$  SEM, calculated from 4 replicates (2–3 cockroaches/replicate); \*\* $P < 0.01$ , two-tailed

1037 Student's *t*-test.

1038



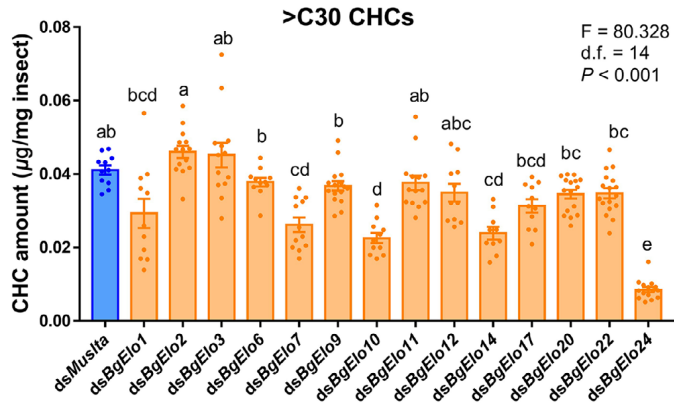

1039

1040 **Figure 2–figure supplement 2.** Effects of *BgeIto*-RNAi on cuticular hydrocarbons of *Blattella germanica* with

1041 chain length longer than 30. Different letters indicate significant differences between groups using Welch's

1042 ANOVA (Games-Howell multiple comparisons test,  $P < 0.05$ ).

1043

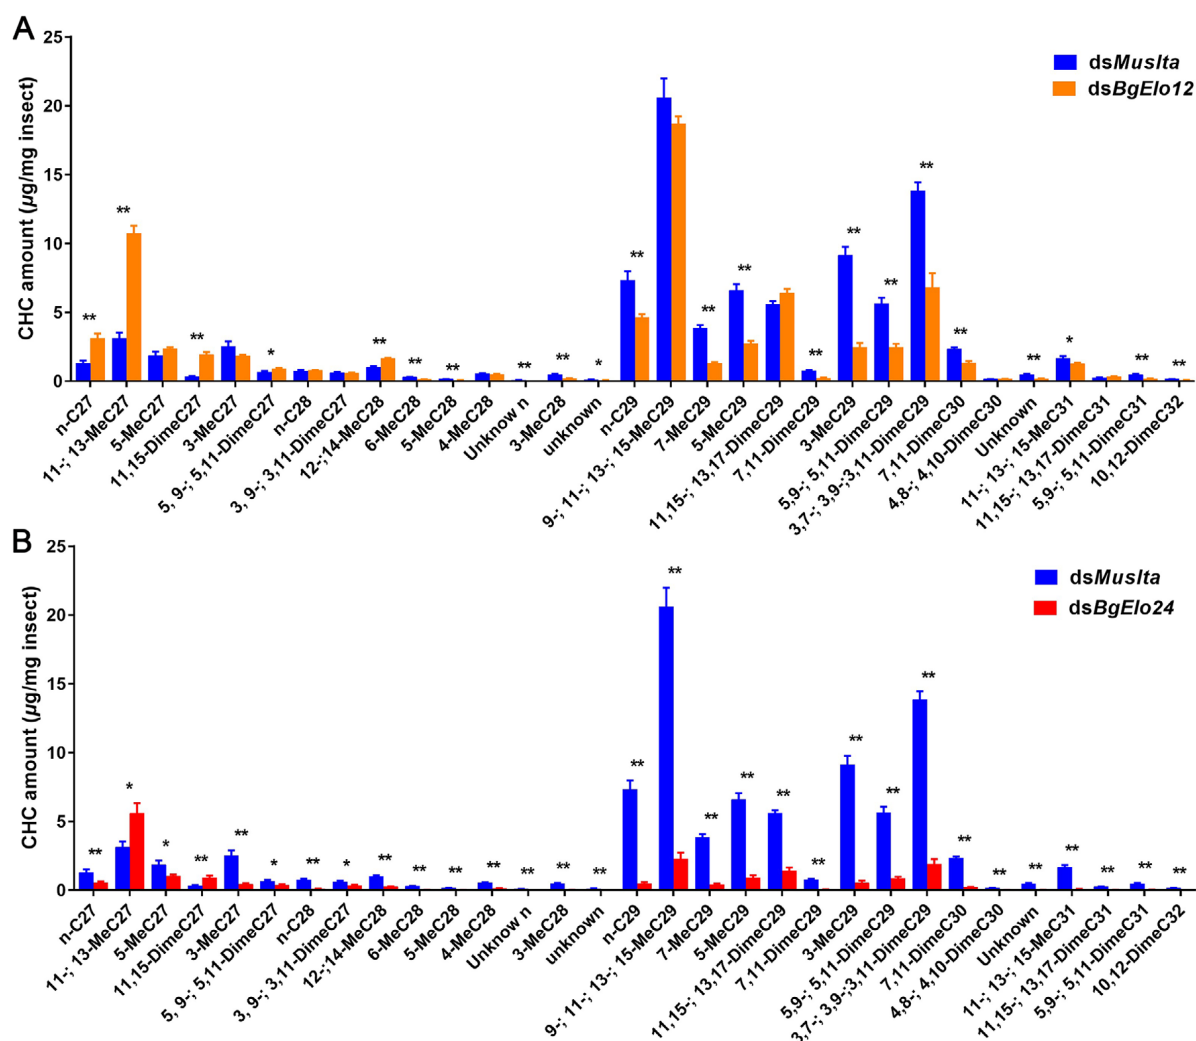

1044

1045 **Figure 3—figure supplement 1.** Effects of *BgElo12*-RNAi and *BgElo24*-RNAi on CHC profiles of male *B.*

1046 *germanica*. Data are shown as mean  $\pm$  SEM; \* $P < 0.05$ , \*\* $P < 0.01$ ; two-tailed Student's *t*-test,  $n = 9$  or  $10$ .

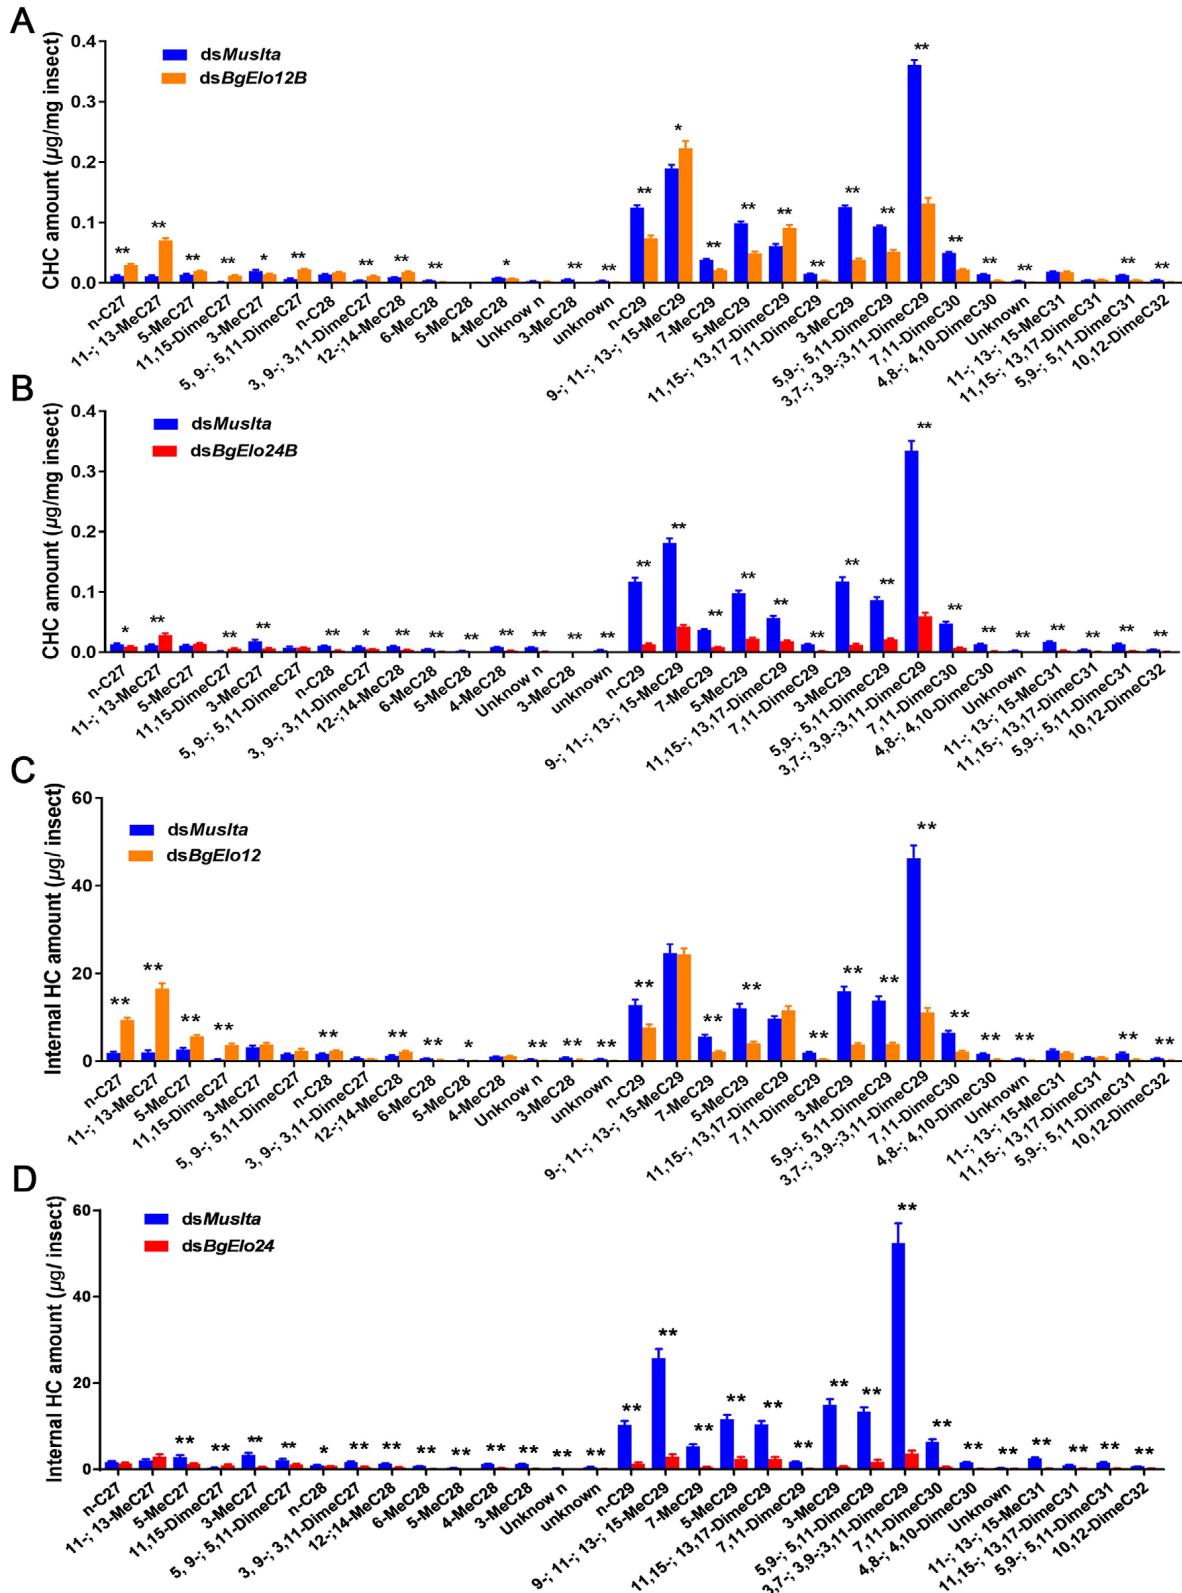

1047

1048

**Figure 3—figure supplement 2.** Verifying the roles of *BgElo12* and *BgElo24* in hydrocarbon biosynthesis by the

1049

second RNAi targets. **(A)** Analysis of cuticular hydrocarbons after RNAi of *BgElo12* using the second target

1050

(ds*BgElo12B*), **(B)** or after RNAi of *BgElo24* using the second target (ds*BgElo24B*). **(C)** and **(D)** The effects of

1051 *BgElo12*-RNAi and *BgElo24*-RNAi on internal hydrocarbons. Data are shown as mean  $\pm$  SEM; \* $P < 0.05$ , \*\* $P <$   
1052 0.01; two-tailed Student's *t*-test, n = 10–12.  
1053

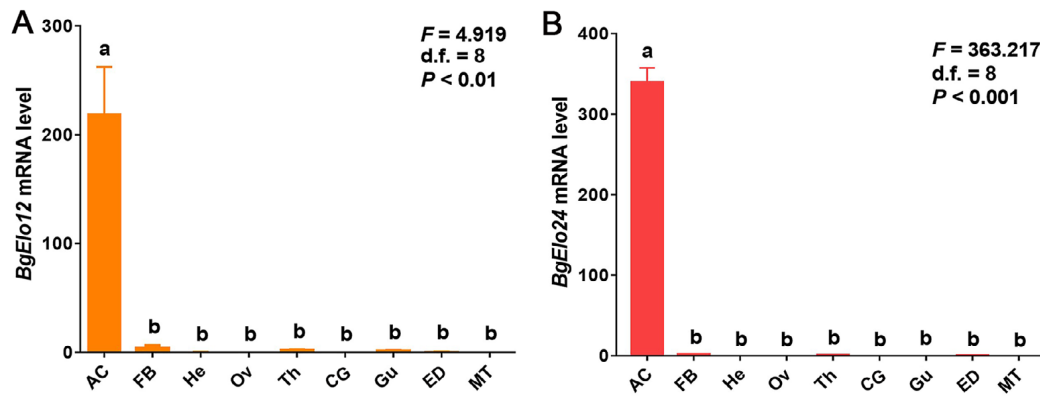

1054

1055 **Figure 3–figure supplement 3.** Tissue-specific expression of *BgElo12* and *BgElo24* in *Blattella germanica*.

1056 AC: Abdominal cuticle, FB: Fat body, He: Head, Ov: Ovaries, Th: Thorax, Cg: Colleterial gland, Gu: Gut, ED:

1057 Ejaculatory duct, MT: Malpighian tubules. Data are shown as mean  $\pm$  SEM; and each sample was collected from

1058 4 (AC, Th, Gu), 8 (FB, He, Ov, CG, ED), and 12 (MT) cockroaches. Different letters indicate significant

1059 differences between groups using Welch's ANOVA (Games-Howell multiple comparisons test,  $P < 0.05$ ),  $n = 4$ .

1060

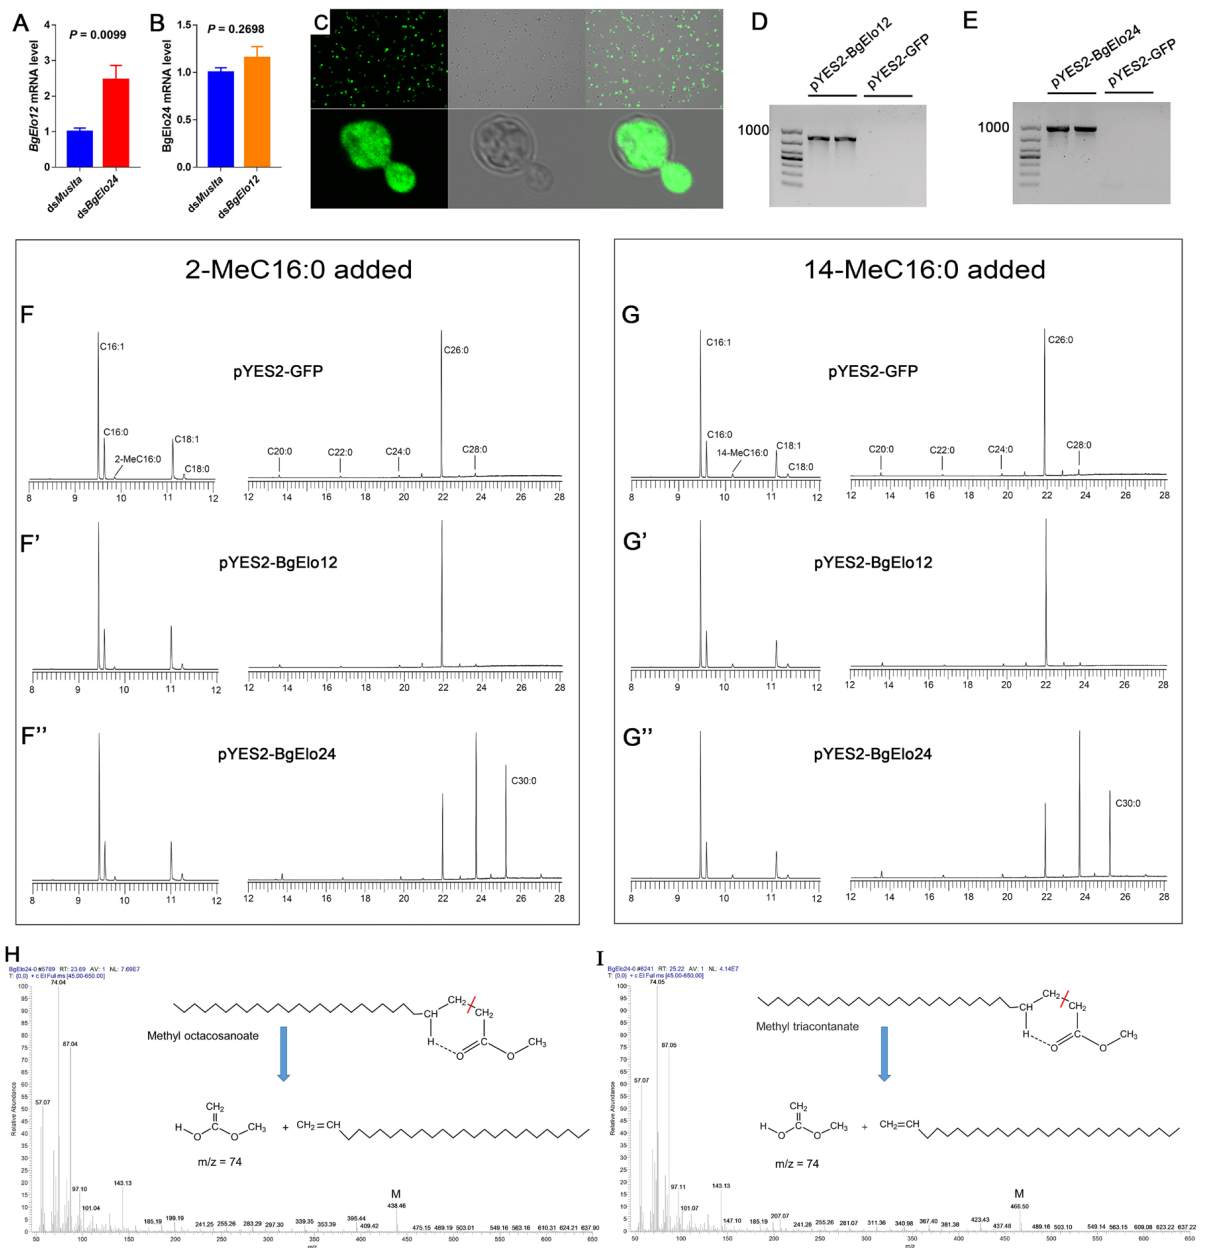

1061

1062 **Figure 4—figure supplement 1. Heterologous expression of *BgElo12* and *BgElo24* in *Blattella germanica*.**

1063 RNAi of *BgElo24* upregulated the expression of *BgElo12* (A), while RNAi of *BgElo12* did not affect *BgElo24*

1064 transcript level (B). Data are shown as mean  $\pm$  SEM; *P* values were calculated from 4 samples; each sample

1065 contained 2 cockroaches; two-tailed Student's *t*-test. (C) Detection of GFP protein in the yeast with pYES2-GFP

1066 using a FV3000 confocal fluorescence microscope (Olympus). (D) and (E) RT-PCR analysis of the *BgElo12* and

1067 *BgElo24* mRNA after the induction with galactose. (F), (F'), and (F'') Gas chromatograms of fatty acid methyl

1068 esters after adding 2-MeC16:0 into the medium. (G), (G'), and (G'') Gas chromatogram of fatty acid methyl

1069 esters after adding 14-MeC16:0 into the medium. The compositions with retention times between 12 and 28 min

1070 were magnified about 50 times. **(H)** and **(I)** Mass spectra of methyl octacosanoate and methyl triacontanate, both  
1071 of which showed a strong characteristic ion fragment ( $m/z = 74$ ) and M peak.  
1072

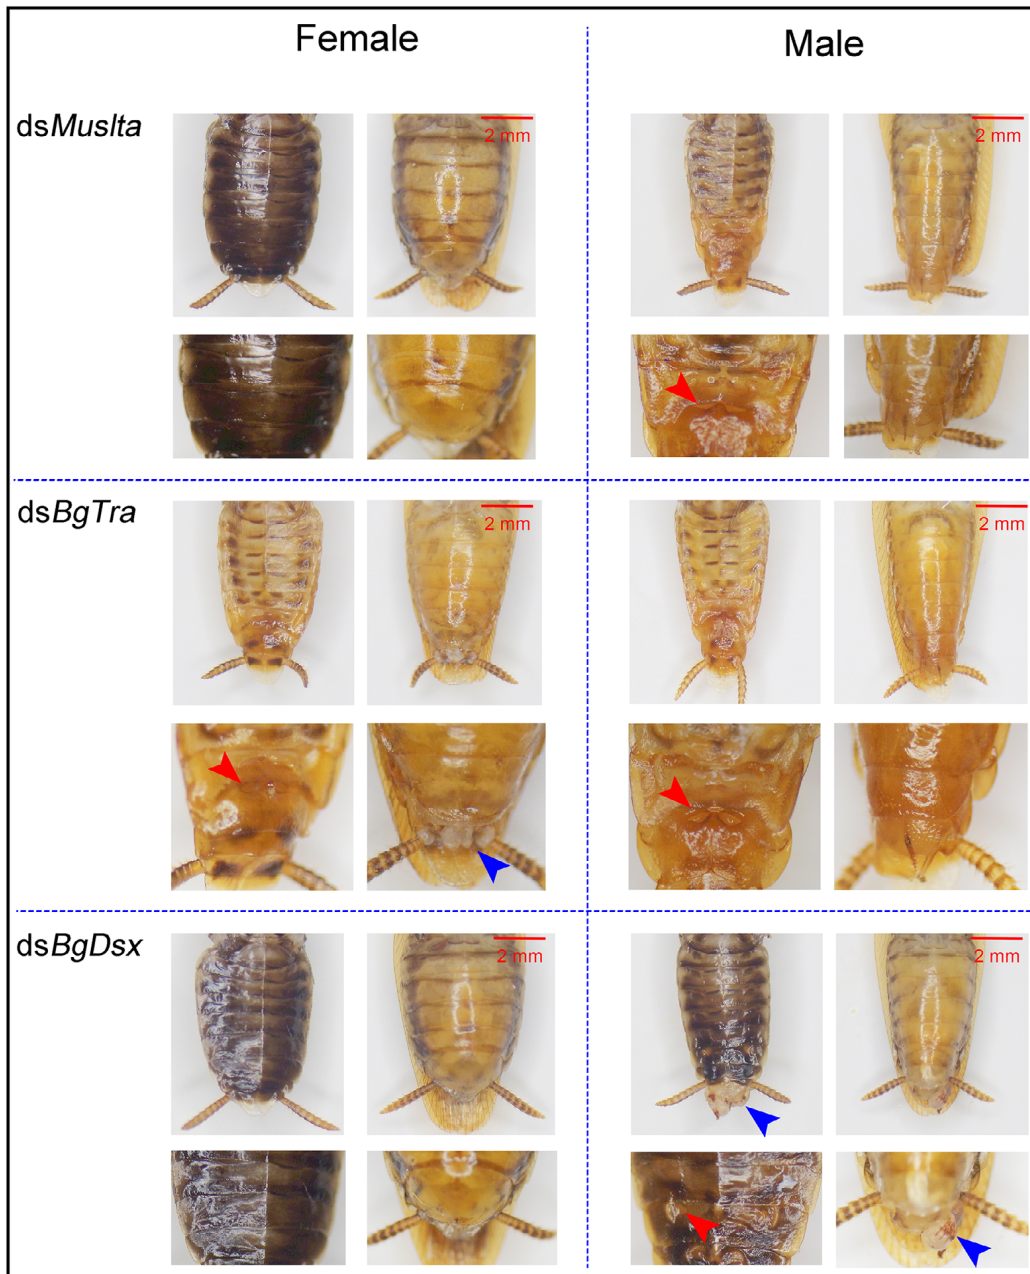

1073

1074 **Figure 6–figure supplement 1.** The sex-specific developmental functions of *BgTra* and *BgDsx* in *Blattella*  
1075 *germanica*. RNAi of *BgTra* in females generated a male-like body size and cuticle color, male-like tergal gland  
1076 structure and a protruding tissue at the end of the abdomen (left center); RNAi of *BgDsx* in males generated a  
1077 female-like body color and a protruding tissue at the end of the abdomen, and the partly disappeared tergal gland  
1078 (right bottom). Other treatments did not generate obvious developmental effects.

1079



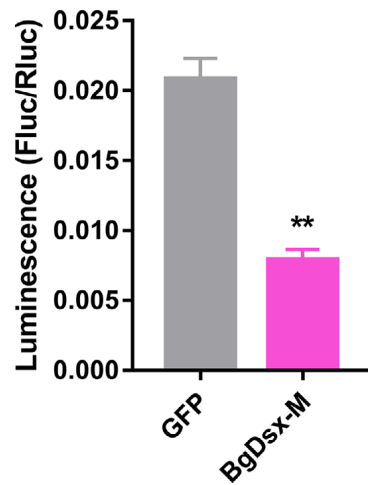

1080

1081 **Figure 6-figure supplement 2.** Transcriptional activity of *BgDsx<sup>M</sup>* on the upstream regulatory sequence of

1082 *BgElo12*. Data are shown as mean  $\pm$  SEM; *P* values were calculated from 12 replicates; two-tailed Student's *t*-

1083 test.

1084

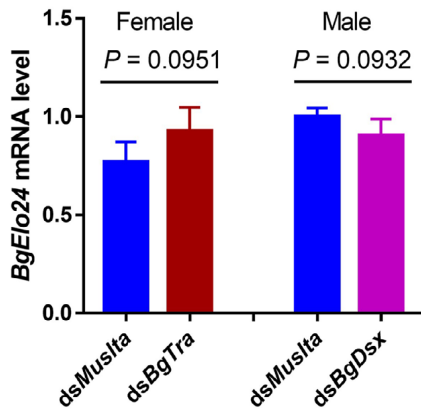

1085

1086 **Figure 6–figure supplement 3.** Effects of *BgDsx*-RNAi in males and *BgTra*-RNAi in females on *BgElo24*

1087 expression. Data are shown as mean  $\pm$  SEM; *P* values were calculated from 4 replicates (2

1088 cockroaches/replicate); two-tailed Student's *t*-test.

1089

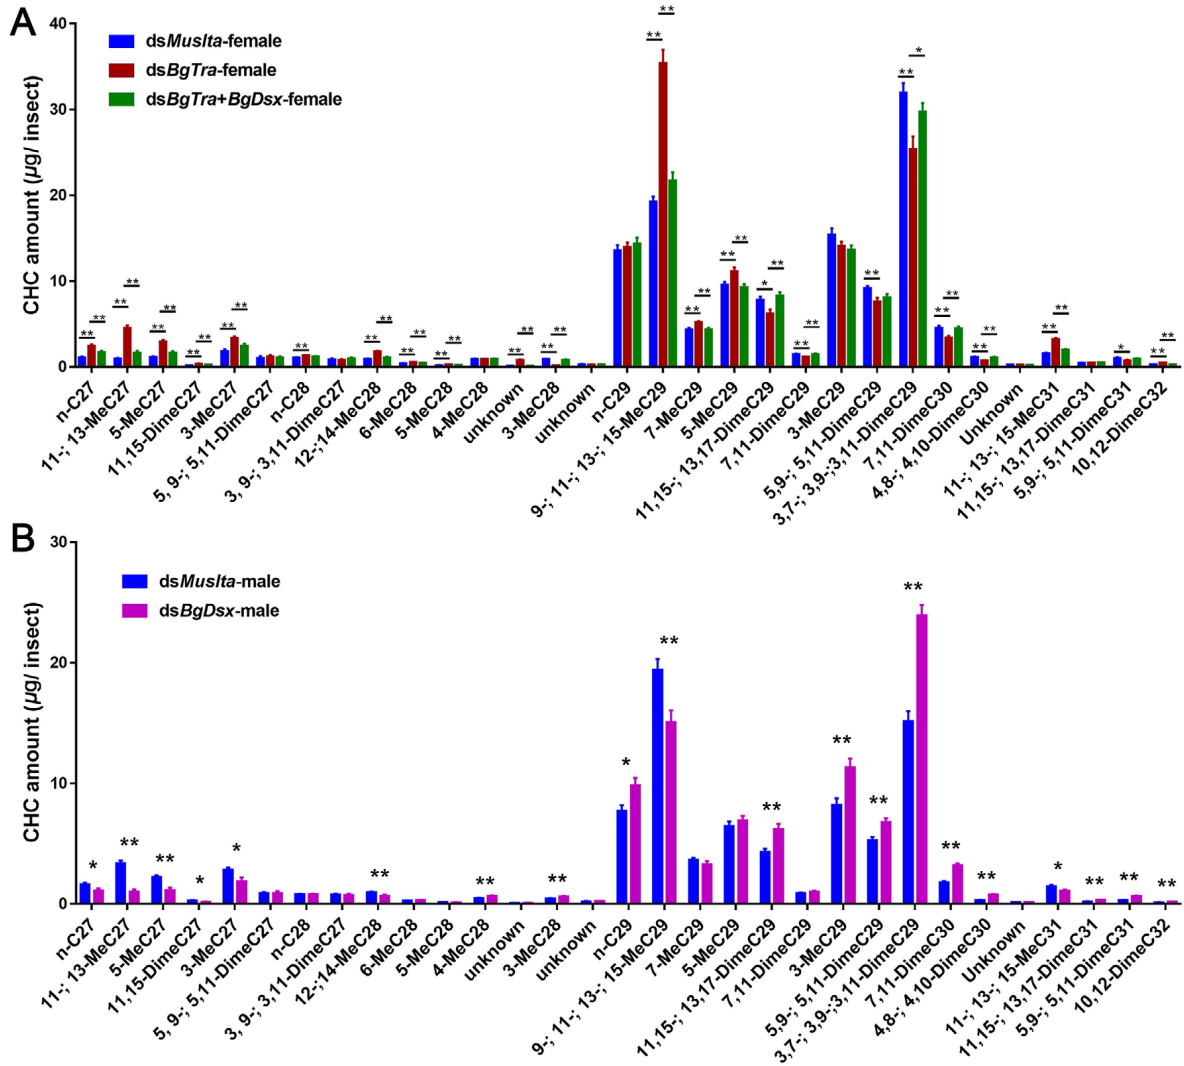

1090

1091

**Figure 6—figure supplement 4.** Regulation of cuticular hydrocarbon profiles by sex-differentiation genes. Data

1092

are shown as mean  $\pm$  SEM, \* $P < 0.05$ , \*\* $P < 0.01$ , two-tailed Student's  $t$ -test,  $n = 14$  (*dsMuslta*-female), 12

1093

(*dsBgTra*-female), 14 (*dsBgTra+dsBgDsx*-female), 12 (*dsMuslta*-male), and 16 (*dsBgDsx*-male).

1094

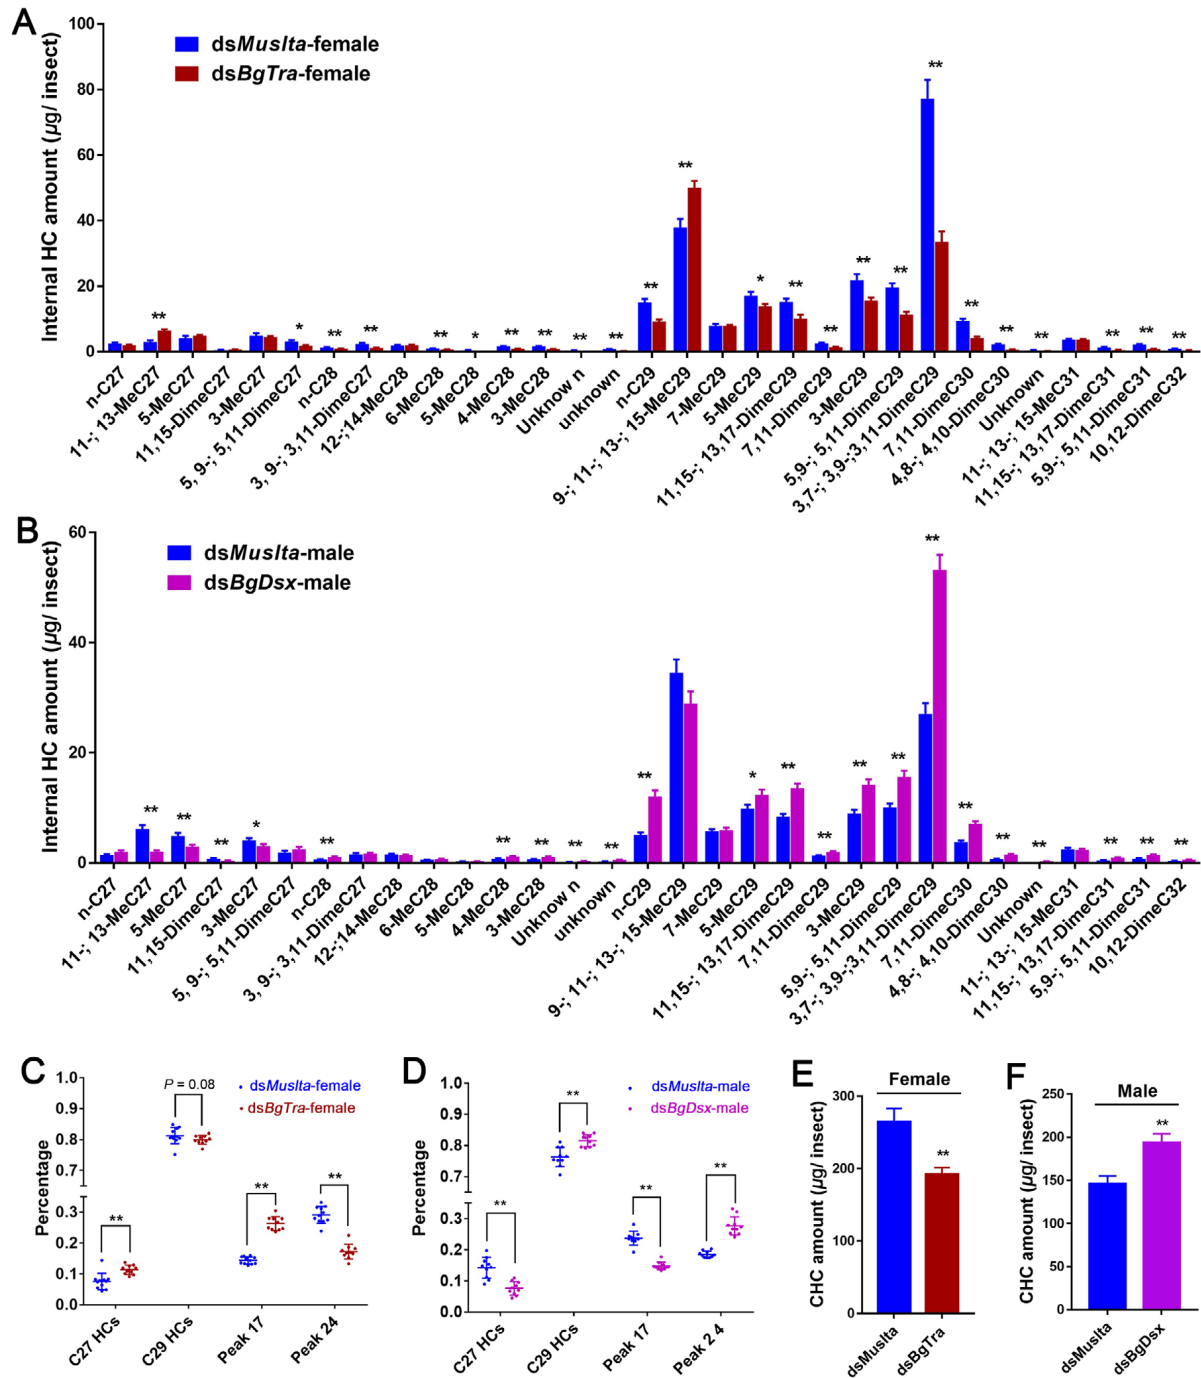

1095

1096

**Figure 6–figure supplement 5.** Regulation of internal hydrocarbon profiles by sex-differentiation genes. **(A)** and

1097

**(B)** Effects of *BgTra*-RNAi in females and *BgDsx*-RNAi in males on sex-specific internal hydrocarbon profiles.

1098

**(C)** and **(D)** Proportion changes of representative internal hydrocarbons after RNAi of *BgTra* in females and

1099

*BgDsx* in males. **(E)** and **(F)** Effects of *BgTra*-RNAi in females and *BgDsx*-RNAi in males on total amounts of

1100

internal hydrocarbons. Data are shown as mean  $\pm$  SEM, \* $P < 0.05$ , \*\* $P < 0.01$ , two-tailed Student's *t*-test,  $n = 10$

1101

or 11.

1102

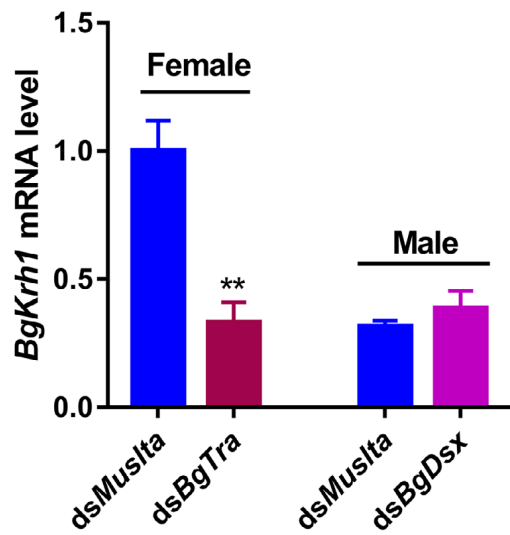

1103

1104 **Figure 6–figure supplement 6.** Regulation of *BgKrrh1* by *BgTra* in females. Data are shown as mean ± SEM, *P*

1105 values were calculated from 4 replicates (2 cockroaches/replicate), \*\**P* < 0.01, two-tailed Student's *t*-test.
